# Supplementary material for: Genome-wide identification of AP2/ERF transcription factor-encoding genes in California poppy (Eschscholzia californica) and their expression profiles in response to methyl jasmonate
Source: PubMed Central journal article supplement (PMC7582171; doi:10.1038/s41598-020-75069-7), 2020-10-22
Supplement: 41598_2020_75069_MOESM1_ESM.pdf [file 41598_2020_75069_MOESM1_ESM.pdf]

## Supplementary information

### **Genome-wide identification of AP2/ERF transcription factor-encoding genes in California poppy (*Eschscholzia californica*) and their expression profiles in response to methyl jasmonate**

Yasuyuki Yamada<sup>1,\*</sup>, Shohei Nishida<sup>2</sup>, Nobukazu Shitan<sup>1</sup>, and Fumihiko Sato<sup>2,3,\*</sup>

<sup>1</sup>Laboratory of Medicinal Cell Biology, Kobe Pharmaceutical University, Kobe, Japan

<sup>2</sup>Department of Plant Gene and Totipotency, Division of Integrated Life Science, Graduate School of Biostudies, Kyoto University, Kyoto, Japan

<sup>3</sup>Graduate School of Science, Osaka Prefecture University, Sakai, Japan

\*Corresponding authors

Email: [yyamada@kobepharma-u.ac.jp](mailto:yyamada@kobepharma-u.ac.jp)/[fsato@lif.kyoto-u.ac.jp](mailto:fsato@lif.kyoto-u.ac.jp)

## Supplementary Table S1

### Identification of AP2/ERF transcription factor gene family in *E. californica*.

| Name               | Gene ID                | CDS length | Genome length | Protein length | Subfamily | Subgroup |
|--------------------|------------------------|------------|---------------|----------------|-----------|----------|
| <i>EcAP2/ERF1</i>  | Eca_sc000448.1_g0520.1 | 669        | 669           | 222            | ERF       | IX       |
| <i>EcAP2/ERF2</i>  | Eca_sc006292.1_g0200.1 | 969        | 969           | 322            | ERF       | IX       |
| <i>EcAP2/ERF3</i>  | Eca_sc006292.1_g0150.1 | 912        | 912           | 303            | ERF       | IX       |
| <i>EcAP2/ERF4</i>  | Eca_sc006292.1_g0190.1 | 906        | 906           | 301            | ERF       | IX       |
| <i>EcAP2/ERF5</i>  | Eca_sc194689.1_g0210.1 | 693        | 3862          | 230            | Soloist   |          |
| <i>EcAP2/ERF6</i>  | Eca_sc000360.1_g1660.1 | 567        | 567           | 188            | ERF       | IX       |
| <i>EcAP2/ERF7</i>  | Eca_sc000360.1_g0090.1 | 1131       | 1131          | 376            | ERF       | VI       |
| <i>EcAP2/ERF8</i>  | Eca_sc003794.1_g0010.1 | 939        | 939           | 312            | ERF       | IX       |
| <i>EcAP2/ERF9</i>  | Eca_sc194674.1_g0040.1 | 438        | 549           | 145            | ERF       | V        |
| <i>EcAP2/ERF10</i> | Eca_sc001253.1_g1650.1 | 816        | 816           | 271            | ERF       | IX       |
| <i>EcAP2/ERF11</i> | Eca_sc194641.1_g1360.1 | 402        | 402           | 133            | ERF       | IX       |
| <i>EcAP2/ERF12</i> | Eca_sc194641.1_g1370.1 | 645        | 645           | 214            | ERF       | IX       |
| <i>EcAP2/ERF13</i> | Eca_sc194697.1_g0440.1 | 1320       | 3048          | 439            | AP2-like  |          |
| <i>EcAP2/ERF14</i> | Eca_sc194641.1_g0520.1 | 600        | 600           | 199            | ERF       | VIII     |
| <i>EcAP2/ERF15</i> | Eca_sc186325.1_g1660.1 | 1104       | 1877          | 367            | AP2       |          |
| <i>EcAP2/ERF16</i> | Eca_sc183659.1_g1650.1 | 828        | 828           | 275            | ERF       | IX       |
| <i>EcAP2/ERF17</i> | Eca_sc194316.1_g0160.1 | 666        | 666           | 221            | ERF       | IX       |
| <i>EcAP2/ERF18</i> | Eca_sc004486.1_g0660.1 | 891        | 891           | 296            | ERF       | IX       |
| <i>EcAP2/ERF19</i> | Eca_sc003030.1_g0120.1 | 636        | 636           | 211            | ERF       | IX       |
| <i>EcAP2/ERF20</i> | Eca_sc194486.1_g2890.1 | 804        | 1888          | 267            | ERF       | X        |
| <i>EcAP2/ERF21</i> | Eca_sc194486.1_g2620.1 | 921        | 1255          | 306            | ERF       | VIII     |
| <i>EcAP2/ERF22</i> | Eca_sc194486.1_g3490.1 | 1098       | 1098          | 365            | RAV       |          |
| <i>EcAP2/ERF23</i> | Eca_sc194094.1_g0110.1 | 825        | 1129          | 274            | ERF       | VII      |
| <i>EcAP2/ERF24</i> | Eca_sc194094.1_g0160.1 | 1329       | 4439          | 442            | ERF       | VII      |
| <i>EcAP2/ERF25</i> | Eca_sc000145.1_g0920.1 | 465        | 465           | 154            | ERF       | VI-L     |
| <i>EcAP2/ERF26</i> | Eca_sc001928.1_g3020.1 | 861        | 861           | 286            | ERF       | X        |
| <i>EcAP2/ERF27</i> | Eca_sc001928.1_g2560.1 | 741        | 741           | 246            | ERF       | VI       |
| <i>EcAP2/ERF28</i> | Eca_sc001928.1_g2870.1 | 954        | 954           | 317            | DREB      | IV       |
| <i>EcAP2/ERF29</i> | Eca_sc194692.1_g0080.1 | 1017       | 1017          | 338            | ERF       | VI       |
| <i>EcAP2/ERF30</i> | Eca_sc014577.1_g1290.1 | 555        | 555           | 184            | ERF       | V        |
| <i>EcAP2/ERF31</i> | Eca_sc194732.1_g0950.1 | 888        | 888           | 295            | ERF       | VIII     |
| <i>EcAP2/ERF32</i> | Eca_sc194794.1_g0100.1 | 1089       | 2584          | 362            | AP2-like  |          |

|                    |                        |      |      |     |          |        |
|--------------------|------------------------|------|------|-----|----------|--------|
| <i>EcAP2/ERF33</i> | Eca_sc184725.1_g0010.1 | 510  | 510  | 169 | ERF      | VIII   |
| <i>EcAP2/ERF34</i> | Eca_sc011255.1_g1900.1 | 546  | 546  | 181 | DREB     | II     |
| <i>EcAP2/ERF35</i> | Eca_sc007884.1_g2280.1 | 1302 | 1302 | 433 | DREB     | I      |
| <i>EcAP2/ERF36</i> | Eca_sc006305.1_g0100.1 | 1062 | 4408 | 353 | ERF      | VII    |
| <i>EcAP2/ERF37</i> | Eca_sc000631.1_g1580.1 | 1221 | 1401 | 406 | DREB     | I      |
| <i>EcAP2/ERF38</i> | Eca_sc194755.1_g0250.1 | 1155 | 1896 | 384 | ERF      | VII    |
| <i>EcAP2/ERF39</i> | Eca_sc000661.1_g2160.1 | 786  | 786  | 261 | ERF      | VI     |
| <i>EcAP2/ERF40</i> | Eca_sc010932.1_g0930.1 | 978  | 2114 | 325 | AP2-like |        |
| <i>EcAP2/ERF41</i> | Eca_sc003774.1_g0170.1 | 633  | 633  | 210 | ERF      | VIII   |
| <i>EcAP2/ERF42</i> | Eca_sc003774.1_g0160.1 | 696  | 696  | 231 | ERF      | VIII   |
| <i>EcAP2/ERF43</i> | Eca_sc002218.1_g1810.1 | 708  | 708  | 235 | ERF      | VIII   |
| <i>EcAP2/ERF44</i> | Eca_sc001921.1_g0160.1 | 1131 | 1131 | 376 | DREB     | I      |
| <i>EcAP2/ERF45</i> | Eca_sc000102.1_g0370.1 | 1050 | 1050 | 349 | ERF      | VI     |
| <i>EcAP2/ERF46</i> | Eca_sc194696.1_g0530.1 | 1140 | 1140 | 379 | ERF      | VIII   |
| <i>EcAP2/ERF47</i> | Eca_sc194696.1_g0250.1 | 1107 | 1107 | 368 | RAV      |        |
| <i>EcAP2/ERF48</i> | Eca_sc194668.1_g0170.1 | 744  | 744  | 247 | ERF      | VIII   |
| <i>EcAP2/ERF49</i> | Eca_sc194668.1_g0700.1 | 657  | 657  | 218 | DREB     | II     |
| <i>EcAP2/ERF50</i> | Eca_sc194668.1_g0380.1 | 708  | 708  | 235 | DREB     | III    |
| <i>EcAP2/ERF51</i> | Eca_sc010606.1_g0230.1 | 1281 | 1281 | 426 | ERF      | VIII   |
| <i>EcAP2/ERF52</i> | Eca_sc001936.1_g0240.1 | 675  | 675  | 224 | ERF      | VIII   |
| <i>EcAP2/ERF53</i> | Eca_sc001139.1_g2640.1 | 1062 | 1062 | 353 | ERF      | VI     |
| <i>EcAP2/ERF54</i> | Eca_sc001139.1_g1450.1 | 1113 | 1113 | 370 | RAV      |        |
| <i>EcAP2/ERF55</i> | Eca_sc194718.1_g0290.1 | 1134 | 1134 | 377 | ERF      | VIII   |
| <i>EcAP2/ERF56</i> | Eca_sc003413.1_g1270.1 | 1086 | 2410 | 361 | ERF      | VII    |
| <i>EcAP2/ERF57</i> | Eca_sc001904.1_g0290.1 | 666  | 666  | 221 | ERF      | VIII   |
| <i>EcAP2/ERF58</i> | Eca_sc194483.1_g1620.1 | 582  | 582  | 193 | ERF      | VIII   |
| <i>EcAP2/ERF59</i> | Eca_sc003893.1_g0980.1 | 846  | 846  | 281 | DREB     | I      |
| <i>EcAP2/ERF60</i> | Eca_sc000537.1_g1470.1 | 432  | 432  | 143 | ERF      | VI-L   |
| <i>EcAP2/ERF61</i> | Eca_sc194561.1_g0040.1 | 657  | 657  | 218 | ERF      | single |
| <i>EcAP2/ERF62</i> | Eca_sc013037.1_g0010.1 | 1041 | 1041 | 346 | ERF      | VI     |
| <i>EcAP2/ERF63</i> | Eca_sc194713.1_g0160.1 | 1248 | 1248 | 415 | DREB     | I      |
| <i>EcAP2/ERF64</i> | Eca_sc194610.1_g0270.1 | 696  | 696  | 231 | DREB     | IV     |
| <i>EcAP2/ERF65</i> | Eca_sc000462.1_g0180.1 | 585  | 665  | 194 | ERF      | V      |
| <i>EcAP2/ERF66</i> | Eca_sc194677.1_g0010.1 | 579  | 579  | 192 | DREB     | II     |
| <i>EcAP2/ERF67</i> | Eca_sc000399.1_g0490.1 | 453  | 453  | 150 | DREB     | II     |
| <i>EcAP2/ERF68</i> | Eca_sc194541.1_g1820.1 | 582  | 582  | 193 | DREB     | III    |

|                     |                        |      |      |     |      |      |
|---------------------|------------------------|------|------|-----|------|------|
| <i>EcAP2/ERF69</i>  | Eca_sc194541.1_g1650.1 | 819  | 819  | 272 | ERF  | VIII |
| <i>EcAP2/ERF70</i>  | Eca_sc194620.1_g0290.1 | 543  | 543  | 180 | DREB | III  |
| <i>EcAP2/ERF71</i>  | Eca_sc194565.1_g0440.1 | 702  | 702  | 233 | DREB | III  |
| <i>EcAP2/ERF72</i>  | Eca_sc004486.1_g0140.1 | 1434 | 2515 | 477 | AP2  |      |
| <i>EcAP2/ERF73</i>  | Eca_sc001713.1_g0320.1 | 723  | 723  | 240 | DREB | III  |
| <i>EcAP2/ERF74</i>  | Eca_sc001301.1_g0740.1 | 879  | 879  | 292 | DREB | III  |
| <i>EcAP2/ERF75</i>  | Eca_sc000630.1_g2480.1 | 804  | 804  | 267 | DREB | III  |
| <i>EcAP2/ERF76</i>  | Eca_sc000630.1_g3370.1 | 606  | 606  | 201 | DREB | III  |
| <i>EcAP2/ERF77</i>  | Eca_sc003926.1_g0060.1 | 717  | 717  | 238 | DREB | III  |
| <i>EcAP2/ERF78</i>  | Eca_sc000587.1_g0100.1 | 756  | 756  | 251 | DREB | III  |
| <i>EcAP2/ERF79</i>  | Eca_sc194602.1_g1910.1 | 555  | 555  | 184 | DREB | III  |
| <i>EcAP2/ERF80</i>  | Eca_sc003743.1_g1960.1 | 522  | 606  | 173 | ERF  | V    |
| <i>EcAP2/ERF81</i>  | Eca_sc001754.1_g0540.1 | 462  | 462  | 153 | DREB | II   |
| <i>EcAP2/ERF82</i>  | Eca_sc002478.1_g1480.1 | 1536 | 2948 | 511 | AP2  |      |
| <i>EcAP2/ERF83</i>  | Eca_sc000388.1_g0060.1 | 702  | 702  | 233 | DREB | III  |
| <i>EcAP2/ERF84</i>  | Eca_sc000388.1_g0070.1 | 738  | 738  | 245 | DREB | III  |
| <i>EcAP2/ERF85</i>  | Eca_sc000388.1_g0090.1 | 618  | 618  | 205 | DREB | III  |
| <i>EcAP2/ERF86</i>  | Eca_sc000388.1_g0100.1 | 702  | 702  | 233 | DREB | III  |
| <i>EcAP2/ERF87</i>  | Eca_sc001536.1_g0070.1 | 765  | 765  | 254 | DREB | III  |
| <i>EcAP2/ERF88</i>  | Eca_sc194756.1_g1130.1 | 828  | 2726 | 275 | DREB | II   |
| <i>EcAP2/ERF89</i>  | Eca_sc186929.1_g0010.1 | 843  | 843  | 280 | DREB | II   |
| <i>EcAP2/ERF90</i>  | Eca_sc002196.1_g0380.1 | 753  | 753  | 250 | DREB | II   |
| <i>EcAP2/ERF91</i>  | Eca_sc001224.1_g0560.1 | 615  | 615  | 204 | DREB | III  |
| <i>EcAP2/ERF92</i>  | Eca_sc001224.1_g0630.1 | 654  | 654  | 217 | DREB | III  |
| <i>EcAP2/ERF93</i>  | Eca_sc194570.1_g1150.1 | 612  | 612  | 203 | DREB | III  |
| <i>EcAP2/ERF94</i>  | Eca_sc001060.1_g0470.1 | 837  | 837  | 278 | DREB | IV   |
| <i>EcAP2/ERF95</i>  | Eca_sc002447.1_g0680.1 | 981  | 981  | 326 | ERF  | VI   |
| <i>EcAP2/ERF96</i>  | Eca_sc001096.1_g0990.1 | 660  | 660  | 219 | DREB | III  |
| <i>EcAP2/ERF97</i>  | Eca_sc000108.1_g1870.1 | 642  | 642  | 213 | DREB | III  |
| <i>EcAP2/ERF98</i>  | Eca_sc002391.1_g1110.1 | 582  | 858  | 193 | ERF  | V    |
| <i>EcAP2/ERF99</i>  | Eca_sc000108.1_g1900.1 | 618  | 618  | 205 | DREB | III  |
| <i>EcAP2/ERF100</i> | Eca_sc000108.1_g1920.1 | 699  | 699  | 232 | DREB | III  |
| <i>EcAP2/ERF101</i> | Eca_sc004328.1_g0980.1 | 1122 | 1122 | 373 | DREB | IV   |
| <i>EcAP2/ERF102</i> | Eca_sc194665.1_g0060.1 | 549  | 549  | 182 | DREB | II   |
| <i>EcAP2/ERF103</i> | Eca_sc003758.1_g2210.1 | 591  | 591  | 196 | DREB | II   |
| <i>EcAP2/ERF104</i> | Eca_sc001803.1_g0310.1 | 957  | 1262 | 318 | DREB | IV   |

|                     |                        |      |      |     |          |      |
|---------------------|------------------------|------|------|-----|----------|------|
| <i>EcAP2/ERF105</i> | Eca_sc002150.1_g1110.1 | 906  | 2621 | 301 | AP2      |      |
| <i>EcAP2/ERF106</i> | Eca_sc002983.1_g1490.1 | 792  | 2385 | 263 | AP2      |      |
| <i>EcAP2/ERF107</i> | Eca_sc002983.1_g1530.1 | 1221 | 3644 | 406 | AP2      |      |
| <i>EcAP2/ERF108</i> | Eca_sc000153.1_g0130.1 | 1647 | 3633 | 548 | AP2      |      |
| <i>EcAP2/ERF109</i> | Eca_sc004205.1_g0740.1 | 1854 | 2914 | 617 | AP2      |      |
| <i>EcAP2/ERF110</i> | Eca_sc001539.1_g0350.1 | 1512 | 3016 | 503 | AP2      |      |
| <i>EcAP2/ERF111</i> | Eca_sc005409.1_g0720.1 | 1722 | 3745 | 573 | AP2      |      |
| <i>EcAP2/ERF112</i> | Eca_sc005351.1_g0210.1 | 1524 | 3501 | 507 | AP2      |      |
| <i>EcAP2/ERF113</i> | Eca_sc002690.1_g1650.1 | 1659 | 4213 | 552 | AP2      |      |
| <i>EcAP2/ERF114</i> | Eca_sc001479.1_g1220.1 | 1122 | 1122 | 373 | ERF      | VI   |
| <i>EcAP2/ERF115</i> | Eca_sc194672.1_g1110.1 | 1782 | 1782 | 593 | AP2-like |      |
| <i>EcAP2/ERF116</i> | Eca_sc000537.1_g1530.1 | 354  | 354  | 117 | ERF      | VI-L |
| <i>EcAP2/ERF117</i> | Eca_sc000212.1_g0400.1 | 2025 | 3226 | 674 | AP2-like |      |
| <i>EcAP2/ERF118</i> | Eca_sc000537.1_g1520.1 | 354  | 354  | 117 | ERF      | VI-L |
| <i>EcAP2/ERF119</i> | Eca_sc000635.1_g0070.1 | 1110 | 1110 | 369 | RAV      |      |
| <i>EcAP2/ERF120</i> | Eca_sc000537.1_g1480.1 | 339  | 339  | 112 | ERF      | VI-L |
| <i>EcAP2/ERF121</i> | Eca_sc184896.1_g0290.1 | 1104 | 1104 | 367 | RAV      |      |
| <i>EcAP2/ERF122</i> | Eca_sc002317.1_g0300.1 | 1128 | 3076 | 375 | AP2      |      |
| <i>EcAP2/ERF123</i> | Eca_sc003758.1_g2660.1 | 945  | 3784 | 314 | AP2      |      |
| <i>EcAP2/ERF124</i> | Eca_sc000587.1_g0190.1 | 1695 | 2670 | 564 | AP2      |      |
| <i>EcAP2/ERF125</i> | Eca_sc001493.1_g0570.1 | 957  | 957  | 318 | ERF      | V    |
| <i>EcAP2/ERF126</i> | Eca_sc194480.1_g0330.1 | 1122 | 1122 | 373 | ERF      | VI   |
| <i>EcAP2/ERF127</i> | Eca_sc194779.1_g0120.1 | 684  | 3468 | 227 | Solist   |      |
| <i>EcAP2/ERF128</i> | Eca_sc000537.1_g1550.1 | 399  | 399  | 132 | ERF      | VI-L |
| <i>EcAP2/ERF129</i> | Eca_sc000537.1_g0740.1 | 1056 | 1709 | 351 | DREB     | IV   |
| <i>EcAP2/ERF130</i> | Eca_sc003765.1_g1250.1 | 1077 | 1177 | 358 | DREB     | IV   |
| <i>EcAP2/ERF131</i> | Eca_sc003765.1_g1130.1 | 921  | 921  | 306 | DREB     | IV   |
| <i>EcAP2/ERF132</i> | Eca_sc186764.1_g0090.1 | 609  | 609  | 202 | DREB     | II   |
| <i>EcAP2/ERF133</i> | Eca_sc000537.1_g1560.1 | 399  | 399  | 132 | ERF      | VI-L |
| <i>EcAP2/ERF134</i> | Eca_sc000537.1_g1460.1 | 399  | 399  | 132 | ERF      | VI-L |

AP2-like has single AP2/ERF domain.

## Supplementary Table S2

### The orthologous relationship between *EcAP2/ERFs* and *AtAP2/ERFs*.

| <b>EcAP2/ERFs</b> | <b>Gene ID<br/>of AtAP2/ERFs</b> |           | <b>Identities<br/>(%)</b> | <b>Positives<br/>(%)</b> | <b>Score<br/>(bits)</b> | <b>E-value</b> | <b>Reciprocal<br/>Best Hit</b> | <b>Phylogenetic<br/>relationship</b> |
|-------------------|----------------------------------|-----------|---------------------------|--------------------------|-------------------------|----------------|--------------------------------|--------------------------------------|
| EcAP2/ERF1        | AT4G17500                        | AtERF1    | 57                        | 68                       | 206                     | 3.00E-56       | ○                              |                                      |
| EcAP2/ERF2        | AT5G47230                        | AtERF5    | 38                        | 53                       | 180                     | 3.00E-48       |                                |                                      |
| EcAP2/ERF3        | AT5G47230                        | AtERF5    | 35                        | 51                       | 146                     | 5.00E-38       |                                |                                      |
| EcAP2/ERF4        | AT5G47230                        | AtERF5    | 35                        | 49                       | 147                     | 4.00E-38       |                                |                                      |
| EcAP2/ERF5        | AT1G13040                        |           | 47                        | 58                       | 176                     | 3.00E-47       | ○                              |                                      |
| EcAP2/ERF6        | AT4G17500                        | AtERF1    | 45                        | 62                       | 132                     | 7.00E-34       |                                |                                      |
| EcAP2/ERF7        | AT5G53290                        | CRF3      | 35                        | 52                       | 189                     | 9.00E-51       |                                |                                      |
| EcAP2/ERF8        | AT5G47230                        | AtERF5    | 42                        | 56                       | 190                     | 3.00E-51       | ○                              |                                      |
| EcAP2/ERF9        | AT5G25190                        | ESE3      | 51                        | 62                       | 154                     | 9.00E-41       |                                | ○                                    |
| EcAP2/ERF10       | AT4G17490                        | ERF6      | 37                        | 54                       | 162                     | 8.00E-43       |                                |                                      |
| EcAP2/ERF11       | AT1G04370                        | ERF14     | 60                        | 75                       | 157                     | 1.00E-41       | ○                              |                                      |
| EcAP2/ERF12       | AT3G23240                        | ERF1      | 55                        | 70                       | 220                     | 2.00E-60       |                                |                                      |
| EcAP2/ERF13       | AT2G41710                        |           | 55                        | 66                       | 407                     | E-116          | ○                              | ○                                    |
| EcAP2/ERF14       | AT5G44210                        | ERF9      | 41                        | 55                       | 112                     | 5.00E-28       |                                |                                      |
| EcAP2/ERF15       | AT4G36920                        | AP2       | 85                        | 93                       | 341                     | E-101          |                                |                                      |
| EcAP2/ERF16       | AT4G18450                        | AtERF#091 | 32                        | 50                       | 126                     | 6.00E-32       | ○                              |                                      |
| EcAP2/ERF17       | AT3G23240                        | ERF1      | 55                        | 68                       | 218                     | 9.00E-60       |                                |                                      |
| EcAP2/ERF18       | AT4G17500                        | AtERF1    | 50                        | 67                       | 155                     | 8.00E-41       |                                |                                      |
| EcAP2/ERF19       | AT3G23240                        | ERF1      | 58                        | 71                       | 227                     | 2.00E-62       | ○                              |                                      |

|             |           |             |    |    |     |          |   |   |
|-------------|-----------|-------------|----|----|-----|----------|---|---|
| EcAP2/ERF20 | AT5G13330 | RAP2.6L     | 48 | 58 | 166 | 4.00E-44 | ○ | ○ |
| EcAP2/ERF21 | AT1G28160 | AtERF#087   | 41 | 54 | 177 | 3.00E-47 | ○ |   |
| EcAP2/ERF22 | AT1G51120 |             | 55 | 68 | 296 | 5.00E-83 | ○ |   |
| EcAP2/ERF23 | AT3G16770 | EBP/RAP2.3  | 46 | 59 | 205 | 1.00E-55 | ○ | ○ |
| EcAP2/ERF24 | AT1G53910 | RAP2.12     | 40 | 50 | 151 | 3.00E-39 |   |   |
| EcAP2/ERF25 | AT5G13910 | LEP         | 48 | 61 | 118 | 8.00E-30 |   |   |
| EcAP2/ERF26 | AT4G34410 | RRTF1       | 51 | 62 | 171 | 2.00E-45 | ○ | ○ |
| EcAP2/ERF27 | AT4G27950 | CRF4        | 39 | 56 | 134 | 2.00E-34 |   |   |
| EcAP2/ERF28 | AT5G05410 | DREB2A      | 37 | 50 | 120 | 4.00E-42 |   |   |
| EcAP2/ERF29 | AT3G25890 | CRF11       | 34 | 52 | 134 | 4.00E-34 | ○ |   |
| EcAP2/ERF30 | AT5G44210 | ERF9        | 32 | 43 | 67  | 3.00E-14 |   |   |
| EcAP2/ERF31 | AT1G28160 | AtERF#087   | 46 | 60 | 167 | 3.00E-44 |   |   |
| EcAP2/ERF32 | AT2G28550 | RAP2.7      | 44 | 55 | 178 | 1.00E-47 |   |   |
| EcAP2/ERF33 | AT1G28360 | ERF12       | 43 | 51 | 132 | 4.00E-34 | ○ | ○ |
| EcAP2/ERF34 | AT4G31060 | AtERF#015   | 41 | 62 | 133 | 2.00E-34 | ○ |   |
| EcAP2/ERF35 | AT1G78080 | RAP2.4      | 41 | 52 | 246 | 7.00E-68 | ○ |   |
| EcAP2/ERF36 | AT1G53910 | RAP2.12     | 44 | 57 | 205 | 1.00E-55 |   |   |
| EcAP2/ERF37 | AT2G20880 | ERF53       | 39 | 48 | 196 | 8.00E-53 | ○ | ○ |
| EcAP2/ERF38 | AT1G53910 | RAP2.12     | 44 | 56 | 283 | 3.00E-79 | ○ |   |
| EcAP2/ERF39 | AT4G27950 | CRF4        | 42 | 58 | 157 | 2.00E-41 |   |   |
| EcAP2/ERF40 | AT3G54320 | WRI1        | 44 | 60 | 141 | 2.00E-36 |   |   |
| EcAP2/ERF41 | AT1G50640 | ERF3        | 50 | 58 | 189 | 4.00E-51 |   |   |
| EcAP2/ERF42 | AT1G50640 | ERF3        | 54 | 64 | 230 | 2.00E-63 | ○ |   |
| EcAP2/ERF43 | AT3G15210 | ERF4/RAP2.5 | 40 | 50 | 134 | 1.00E-34 |   |   |
| EcAP2/ERF44 | AT1G78080 | RAP2.4      | 56 | 67 | 207 | 1.00E-56 |   |   |

|             |           |             |    |    |     |          |   |   |
|-------------|-----------|-------------|----|----|-----|----------|---|---|
| EcAP2/ERF45 | AT4G27950 | CRF4        | 38 | 54 | 210 | 4.00E-57 | ○ |   |
| EcAP2/ERF46 | AT1G24590 | ESR2/DRNL   | 39 | 47 | 139 | 1.00E-35 | ○ |   |
| EcAP2/ERF47 | AT1G25560 | TEM3        | 59 | 68 | 368 | E-104    |   |   |
| EcAP2/ERF48 | AT3G15210 | ERF4/RAP2.5 | 43 | 55 | 142 | 1.00E-36 |   |   |
| EcAP2/ERF49 | AT1G19210 | AtERF#017   | 45 | 56 | 155 | 7.00E-41 |   |   |
| EcAP2/ERF50 | AT3G60490 | AtERF#035   | 48 | 64 | 204 | 2.00E-55 | ○ |   |
| EcAP2/ERF51 | AT1G24590 | ESR2/ERNL   | 39 | 50 | 139 | 2.00E-35 |   |   |
| EcAP2/ERF52 | AT3G15210 | ERF4/RAP2.5 | 40 | 55 | 134 | 1.00E-34 |   |   |
| EcAP2/ERF53 | AT4G23750 | CRF2        | 36 | 51 | 186 | 5.00E-50 |   |   |
| EcAP2/ERF54 | AT1G25560 | TEM3        | 58 | 70 | 399 | E-114    | ○ |   |
| EcAP2/ERF55 | AT5G18560 | PUCHI       | 47 | 55 | 185 | 2.00E-49 | ○ | ○ |
| EcAP2/ERF56 | AT1G53910 | RAP2.12     | 44 | 55 | 269 | 8.00E-75 |   |   |
| EcAP2/ERF57 | AT1G50640 | ERF3        | 55 | 63 | 217 | 2.00E-59 |   |   |
| EcAP2/ERF58 |           |             |    |    |     |          |   |   |
| EcAP2/ERF59 | AT1G64380 | AtERF#061   | 41 | 55 | 214 | 2.00E-58 | ○ | ○ |
| EcAP2/ERF60 |           |             |    |    |     |          |   |   |
| EcAP2/ERF61 | AT1G80580 | AtERF#084   | 44 | 57 | 145 | 6.00E-38 | ○ | ○ |
| EcAP2/ERF62 | AT4G23750 | CRF2        | 36 | 51 | 169 | 8.00E-45 |   |   |
| EcAP2/ERF63 | AT4G13620 | AtERF#062   | 37 | 51 | 183 | 7.00E-49 | ○ | ○ |
| EcAP2/ERF64 | AT1G75490 | DREB2D      | 45 | 60 | 165 | 8.00E-44 | ○ | ○ |
| EcAP2/ERF65 | AT5G25190 | ESE3        | 54 | 66 | 191 | 1.00E-51 | ○ |   |
| EcAP2/ERF66 | AT4G36900 | RAP2.10     | 50 | 60 | 155 | 6.00E-41 |   |   |
| EcAP2/ERF67 | AT5G67190 | DEAR2       | 56 | 65 | 168 | 5.00E-45 | ○ |   |
| EcAP2/ERF68 | AT1G71450 | AtERF#021   | 50 | 61 | 167 | 2.00E-44 | ○ |   |
| EcAP2/ERF69 | AT5G13910 | LEP         | 45 | 56 | 180 | 4.00E-48 | ○ |   |



|             |           |             |    |    |     |          |   |   |
|-------------|-----------|-------------|----|----|-----|----------|---|---|
| EcAP2/ERF70 | AT1G33760 | AtERF#022   | 46 | 64 | 149 | 5.00E-39 |   |   |
| EcAP2/ERF71 | AT5G11590 | TINY2       | 57 | 66 | 200 | 2.00E-54 |   |   |
| EcAP2/ERF72 | AT2G28550 | RAP2.7      | 49 | 58 | 316 | 6.00E-89 |   | ○ |
| EcAP2/ERF73 | AT5G11590 | TINY2       | 57 | 68 | 216 | 4.00E-59 |   |   |
| EcAP2/ERF74 | AT5G11590 | TINY2       | 51 | 63 | 214 | 1.00E-58 |   |   |
| EcAP2/ERF75 | AT5G11590 | TINY2       | 63 | 71 | 223 | 4.00E-61 | ○ |   |
| EcAP2/ERF76 | AT2G36450 | HRD         | 52 | 66 | 182 | 5.00E-49 |   |   |
| EcAP2/ERF77 | AT3G60490 | AtERF#035   | 48 | 64 | 202 | 6.00E-55 |   |   |
| EcAP2/ERF78 | AT3G60490 | AtERF#035   | 46 | 60 | 166 | 5.00E-44 |   |   |
| EcAP2/ERF79 | AT1G01250 | AtERF#023   | 59 | 65 | 186 | 3.00E-50 | ○ | ○ |
| EcAP2/ERF80 | AT5G25190 | ESE3        | 56 | 66 | 180 | 2.00E-48 |   |   |
| EcAP2/ERF81 | AT5G67190 | DEAR2       | 54 | 62 | 154 | 1.00E-40 |   |   |
| EcAP2/ERF82 | AT2G28550 | RAP2.7      | 50 | 59 | 381 | E-108    |   |   |
| EcAP2/ERF83 | AT5G51990 | CBF4/DREB1D | 55 | 66 | 222 | 7.00E-61 | ○ |   |
| EcAP2/ERF84 | AT5G51990 | CBF4/DREB1D | 52 | 64 | 207 | 1.00E-56 |   |   |
| EcAP2/ERF85 | AT5G51990 | CBF4/DREB1D | 54 | 65 | 184 | 1.00E-49 |   |   |
| EcAP2/ERF86 | AT5G51990 | CBF4/DREB1D | 54 | 64 | 208 | 1.00E-56 |   |   |
| EcAP2/ERF87 | AT1G63040 | AtERF#026   | 54 | 67 | 193 | 4.00E-52 | ○ |   |
| EcAP2/ERF88 | AT1G77640 | AtERF#013   | 49 | 61 | 161 | 1.00E-42 |   |   |
| EcAP2/ERF89 | AT1G44830 | AtERF#014   | 47 | 56 | 183 | 3.00E-49 |   |   |
| EcAP2/ERF90 | AT1G44830 | AtERF#014   | 48 | 60 | 188 | 9.00E-51 | ○ |   |
| EcAP2/ERF91 | AT2G36450 | HRD         | 60 | 72 | 192 | 5.00E-52 | ○ | ○ |
| EcAP2/ERF92 | AT5G51990 | CBF4/DREB1D | 53 | 68 | 185 | 6.00E-50 |   |   |
| EcAP2/ERF93 | AT1G63040 | AtERF#026   | 50 | 64 | 190 | 2.00E-51 |   |   |
| EcAP2/ERF94 | AT3G57600 | DREB2F      | 53 | 68 | 272 | 7.00E-76 | ○ | ○ |

|              |           |             |    |    |     |          |   |   |
|--------------|-----------|-------------|----|----|-----|----------|---|---|
| EcAP2/ERF95  | AT1G68550 | CRF10       | 33 | 46 | 122 | 8.00E-31 |   |   |
| EcAP2/ERF96  | AT5G51990 | CBF4/DREB1D | 51 | 64 | 183 | 3.00E-49 |   |   |
| EcAP2/ERF97  | AT5G51990 | CBF4/DREB1D | 53 | 65 | 203 | 3.00E-55 |   |   |
| EcAP2/ERF98  | AT1G15360 | WIN1/SHN1   | 58 | 72 | 221 | 9.00E-61 | ○ | ○ |
| EcAP2/ERF99  | AT5G51990 | CBF4/DREB1D | 52 | 61 | 189 | 5.00E-51 |   |   |
| EcAP2/ERF100 | AT5G51990 | CBF4/DREB1D | 52 | 64 | 198 | 8.00E-54 |   |   |
| EcAP2/ERF101 | AT2G40220 | ABI4        | 40 | 55 | 225 | 1.00E-61 | ○ |   |
| EcAP2/ERF102 | AT4G31060 | AtERF#015   | 41 | 58 | 129 | 3.00E-33 |   |   |
| EcAP2/ERF103 | AT1G19210 | AtERF#017   | 49 | 61 | 169 | 6.00E-45 | ○ |   |
| EcAP2/ERF104 | AT2G40340 | DREB2C      | 35 | 49 | 165 | 1.00E-43 |   |   |
| EcAP2/ERF105 | AT1G51190 | PLT2        | 52 | 66 | 243 | 3.00E-67 |   |   |
| EcAP2/ERF106 | AT5G17430 | BBM         | 62 | 77 | 252 | 7.00E-70 |   |   |
| EcAP2/ERF107 | AT5G65510 | AIL7        | 44 | 57 | 220 | 4.00E-60 |   |   |
| EcAP2/ERF108 | AT5G10510 | AIL6        | 43 | 54 | 396 | E-113    | ○ | ○ |
| EcAP2/ERF109 | AT4G37750 | ANT         | 50 | 64 | 447 | E-128    | ○ | ○ |
| EcAP2/ERF110 | AT2G28550 | RAP2.7      | 50 | 61 | 385 | E-110    | ○ |   |
| EcAP2/ERF111 | AT4G37750 | ANT         | 37 | 49 | 277 | 5.00E-77 |   |   |
| EcAP2/ERF112 | AT5G57390 | AIL5        | 47 | 56 | 444 | E-127    |   | ○ |
| EcAP2/ERF113 | AT1G51190 | PLT2        | 47 | 57 | 452 | E-129    |   |   |
| EcAP2/ERF114 | AT4G23750 | CRF2        | 31 | 43 | 107 | 4.00E-26 |   |   |
| EcAP2/ERF115 | AT3G20840 | PLT1        | 41 | 56 | 151 | 3.00E-39 |   |   |
| EcAP2/ERF116 | AT1G49120 | CRF9        | 28 | 56 | 54  | 1.00E-10 |   |   |
| EcAP2/ERF117 |           |             |    |    |     |          |   |   |
| EcAP2/ERF118 | AT1G03800 | ERF10       | 33 | 44 | 57  | 2.00E-11 |   |   |
| EcAP2/ERF119 | AT1G68840 | RAV2        | 57 | 70 | 369 | E-105    |   |   |

|              |           |           |    |    |     |          |   |   |
|--------------|-----------|-----------|----|----|-----|----------|---|---|
| EcAP2/ERF120 | AT3G20310 | ERF7      | 38 | 53 | 55  | 7.00E-11 |   |   |
| EcAP2/ERF121 | AT1G25560 | TEM3      | 60 | 69 | 394 | E-112    |   |   |
| EcAP2/ERF122 | AT3G54320 | WRI1      | 51 | 61 | 324 | 2.00E-91 | ○ | ○ |
| EcAP2/ERF123 | AT1G16060 | ADAP      | 44 | 53 | 250 | 3.00E-69 |   |   |
| EcAP2/ERF124 | AT4G36920 | AP2       | 45 | 54 | 400 | E-114    | ○ |   |
| EcAP2/ERF125 | AT5G19790 | RAP2.11   | 43 | 53 | 197 | 3.00E-53 | ○ | ○ |
| EcAP2/ERF126 | AT4G23750 | CRF2      | 38 | 53 | 202 | 1.00E-54 |   |   |
| EcAP2/ERF127 |           |           |    |    |     |          |   |   |
| EcAP2/ERF128 | AT1G03800 | ERF10     | 34 | 47 | 67  | 2.00E-14 |   |   |
| EcAP2/ERF129 | AT2G40340 | DREB2C    | 36 | 50 | 181 | 2.00E-48 |   |   |
| EcAP2/ERF130 | AT2G40340 | DREB2C    | 38 | 51 | 199 | 1.00E-53 | ○ |   |
| EcAP2/ERF131 | AT2G40220 | ABI4      | 40 | 53 | 177 | 2.00E-47 |   |   |
| EcAP2/ERF132 | AT1G19210 | AtERF#017 | 47 | 58 | 148 | 8.00E-39 |   |   |
| EcAP2/ERF133 | AT1G03800 | ERF10     | 38 | 49 | 162 | 2.00E-14 |   |   |
| EcAP2/ERF134 | AT3G20310 | ERF7      | 43 | 56 | 59  | 5.00E-12 |   |   |

---

## Supplementary Table S2

A comparison of genes percent in each family of *EcAP2/ERF* with other plant species.

| Plant specie                                   |             | AP2   | RAV  | Solo | DREB  | ERF   | Total | Genome size (Mb) | Gene density (per Mb) | Reference                          |
|------------------------------------------------|-------------|-------|------|------|-------|-------|-------|------------------|-----------------------|------------------------------------|
| <i>Eschscholzia californica</i>                | Gene number | 20    | 5    | 2    | 47    | 60    | 134   | 502              | 0.267                 | This study                         |
|                                                | Percent     | 14.93 | 3.73 | 1.49 | 35.07 | 44.78 |       |                  |                       |                                    |
| <i>Arabidopsis thaliana</i>                    | Gene number | 18    | 6    | 1    | 57    | 65    | 147   | 125              | 1.176                 | Nakano et al., 2006 <sup>16</sup>  |
|                                                | Percent     | 12.24 | 4.08 | 0.68 | 38.78 | 44.22 |       |                  |                       |                                    |
| <i>Vitis vinifera</i>                          | Gene number | 20    | 6    | 1    | 40    | 82    | 149   | 490              | 0.304                 | Licausi et al., 2010 <sup>32</sup> |
|                                                | Percent     | 13.42 | 4.03 | 0.67 | 26.85 | 55.03 |       |                  |                       |                                    |
| <i>Medicago truncatula</i>                     | Gene number | 21    | 3    | 1    | 50    | 48    | 123   | 465              | 0.265                 | Shu et al., 2016 <sup>59</sup>     |
|                                                | Percent     | 17.07 | 2.44 | 0.81 | 40.65 | 39.02 |       |                  |                       |                                    |
| <i>Ricinus communis</i>                        | Gene number | 19    | 4    | 1    | 34    | 56    | 114   | 310              | 0.368                 | Xu et al., 2013 <sup>25</sup>      |
|                                                | Percent     | 16.67 | 3.51 | 0.88 | 29.82 | 49.12 |       |                  |                       |                                    |
| <i>Ziziphus jujuba</i>                         | Gene number | 17    | 5    | 1    | 39    | 57    | 119   | 360              | 0.331                 | Zhang and Li, 2018 <sup>35</sup>   |
|                                                | Percent     | 14.29 | 4.20 | 0.84 | 32.77 | 47.90 |       |                  |                       |                                    |
| <i>Populus trichocarpa</i>                     | Gene number | 26    | 5    | 1    | 77    | 91    | 200   | 485              | 0.412                 | Zhuang et al., 2008 <sup>37</sup>  |
|                                                | Percent     | 13.00 | 2.50 | 0.50 | 38.50 | 45.50 |       |                  |                       |                                    |
| <i>Brassica rapa</i> ssp.<br><i>pekinensis</i> | Gene number | 30    | 14   | 1    | 105   | 131   | 281   | 485              | 0.579                 | Liu et al., 2013 <sup>38</sup>     |
|                                                | Percent     | 10.68 | 4.98 | 0.36 | 37.37 | 46.62 |       |                  |                       |                                    |
| <i>Daucus carota</i>                           | Gene number | 38    | 12   | 3    | 69    | 145   | 267   | 480              | 0.556                 | Li et al., 2015 <sup>34</sup>      |
|                                                | Percent     | 14.23 | 4.49 | 1.12 | 25.84 | 54.31 |       |                  |                       |                                    |

|                                        |             |       |      |      |       |       |     |      |       |                                    |
|----------------------------------------|-------------|-------|------|------|-------|-------|-----|------|-------|------------------------------------|
| <i>Oryza sativa</i> L. <i>japonica</i> | Gene number | 24    | 5    | 0    | 57    | 77    | 163 | 389  | 0.419 | Sharoni et al., 2011 <sup>33</sup> |
|                                        | Percent     | 14.72 | 3.07 | 0.00 | 34.97 | 47.24 |     |      |       |                                    |
| <i>Brachypodium distachyon</i>         | Gene number | 24    | 4    | 1    | 52    | 60    | 141 | 355  | 0.397 | Cui et al., 2016 <sup>27</sup>     |
|                                        | Percent     | 17.02 | 2.84 | 0.71 | 36.88 | 42.55 |     |      |       |                                    |
| <i>Setaria italica</i>                 | Gene number | 28    | 5    | 0    | 48    | 90    | 171 | 515  | 0.332 | Lata et al., 2014 <sup>60</sup>    |
|                                        | Percent     | 16.37 | 2.92 | 0.00 | 28.07 | 52.63 |     |      |       |                                    |
| <i>Phyllostachys edulis</i>            | Gene number | 28    | 7    | 1    | 27    | 53    | 116 | 2075 | 0.056 | Wu et al., 2015 <sup>26</sup>      |
|                                        | Percent     | 24.14 | 6.03 | 0.86 | 23.28 | 45.69 |     |      |       |                                    |

59. Shu, Y., Liu, Y., Zhang, J., Song, L. & Guo, C. Genome-Wide Analysis of the AP2/ERF Superfamily Genes and their Responses to

Abiotic Stress in *Medicago truncatula*. *Front. Plant. Sci.* **6**, 1247, <https://doi.org/10.3389/fpls.2015.01247> (2015).

60. Lata, C. *et al.* Genome-wide investigation and expression profiling of AP2/ERF transcription factor superfamily in foxtail millet

(*Setaria italica* L.). *PLoS One* **9**, e113092, <https://doi.org/10.1371/journal.pone.0113092> (2014).

### Supplementary Table S3

#### A location of *EcAP2/ERF* genes in each scaffold.

| Scaffold       | Genes                                                                                                                                                          |
|----------------|----------------------------------------------------------------------------------------------------------------------------------------------------------------|
| Eca_sc000102.1 | <i>EcAP2/ERF45</i>                                                                                                                                             |
| Eca_sc000108.1 | <i>EcAP2/ERF97</i> <i>EcAP2/ERF99</i> <i>EcAP2/ERF100</i>                                                                                                      |
| Eca_sc000145.1 | <i>EcAP2/ERF25</i>                                                                                                                                             |
| Eca_sc000153.1 | <i>EcAP2/ERF108</i>                                                                                                                                            |
| Eca_sc000212.1 | <i>EcAP2/ERF117</i>                                                                                                                                            |
| Eca_sc000360.1 | <i>EcAP2/ERF7</i> <i>EcAP2/ERF6</i>                                                                                                                            |
| Eca_sc000388.1 | <i>EcAP2/ERF83</i> <i>EcAP2/ERF84</i> <i>EcAP2/ERF85</i> <i>EcAP2/ERF86</i>                                                                                    |
| Eca_sc000399.1 | <i>EcAP2/ERF67</i>                                                                                                                                             |
| Eca_sc000448.1 | <i>EcAP2/ERF1</i>                                                                                                                                              |
| Eca_sc000462.1 | <i>EcAP2/ERF65</i>                                                                                                                                             |
| Eca_sc000537.1 | <i>EcAP2/ERF129</i> <i>EcAP2/ERF134</i> <i>EcAP2/ERF60</i> <i>EcAP2/ERF120</i> <i>EcAP2/ERF118</i> <i>EcAP2/ERF116</i> <i>EcAP2/ERF128</i> <i>EcAP2/ERF133</i> |
| Eca_sc000587.1 | <i>EcAP2/ERF78</i> <i>EcAP2/ERF124</i>                                                                                                                         |
| Eca_sc000630.1 | <i>EcAP2/ERF75</i> <i>EcAP2/ERF76</i>                                                                                                                          |
| Eca_sc000631.1 | <i>EcAP2/ERF37</i>                                                                                                                                             |
| Eca_sc000635.1 | <i>EcAP2/ERF119</i>                                                                                                                                            |
| Eca_sc000661.1 | <i>EcAP2/ERF39</i>                                                                                                                                             |
| Eca_sc001060.1 | <i>EcAP2/ERF94</i>                                                                                                                                             |
| Eca_sc001096.1 | <i>EcAP2/ERF96</i>                                                                                                                                             |
| Eca_sc001139.1 | <i>EcAP2/ERF54</i> <i>EcAP2/ERF53</i>                                                                                                                          |

|                |                     |                     |                    |
|----------------|---------------------|---------------------|--------------------|
| Eca_sc001224.1 | <i>EcAP2/ERF91</i>  | <i>EcAP2/ERF92</i>  |                    |
| Eca_sc001253.1 | <i>EcAP2/ERF10</i>  |                     |                    |
| Eca_sc001301.1 | <i>EcAP2/ERF74</i>  |                     |                    |
| Eca_sc001479.1 | <i>EcAP2/ERF114</i> |                     |                    |
| Eca_sc001493.1 | <i>EcAP2/ERF125</i> |                     |                    |
| Eca_sc001536.1 | <i>EcAP2/ERF87</i>  |                     |                    |
| Eca_sc001539.1 | <i>EcAP2/ERF110</i> |                     |                    |
| Eca_sc001713.1 | <i>EcAP2/ERF73</i>  |                     |                    |
| Eca_sc001754.1 | <i>EcAP2/ERF81</i>  |                     |                    |
| Eca_sc001803.1 | <i>EcAP2/ERF104</i> |                     |                    |
| Eca_sc001904.1 | <i>EcAP2/ERF57</i>  |                     |                    |
| Eca_sc001921.1 | <i>EcAP2/ERF44</i>  |                     |                    |
| Eca_sc001928.1 | <i>EcAP2/ERF27</i>  | <i>EcAP2/ERF28</i>  | <i>EcAP2/ERF26</i> |
| Eca_sc001936.1 | <i>EcAP2/ERF52</i>  |                     |                    |
| Eca_sc002196.1 | <i>EcAP2/ERF90</i>  |                     |                    |
| Eca_sc002218.1 | <i>EcAP2/ERF43</i>  |                     |                    |
| Eca_sc002317.1 | <i>EcAP2/ERF122</i> |                     |                    |
| Eca_sc002391.1 | <i>EcAP2/ERF98</i>  |                     |                    |
| Eca_sc002447.1 | <i>EcAP2/ERF95</i>  |                     |                    |
| Eca_sc002690.1 | <i>EcAP2/ERF113</i> |                     |                    |
| Eca_sc002983.1 | <i>EcAP2/ERF106</i> | <i>EcAP2/ERF107</i> |                    |
| Eca_sc003030.1 | <i>EcAP2/ERF19</i>  |                     |                    |
| Eca_sc003413.1 | <i>EcAP2/ERF56</i>  |                     |                    |

|                |                     |                     |                   |  |
|----------------|---------------------|---------------------|-------------------|--|
| Eca_sc003743.1 | <i>EcAP2/ERF80</i>  |                     |                   |  |
| Eca_sc003758.1 | <i>EcAP2/ERF103</i> | <i>EcAP2/ERF123</i> |                   |  |
| Eca_sc003765.1 | <i>EcAP2/ERF131</i> | <i>EcAP2/ERF130</i> |                   |  |
| Eca_sc003774.1 | <i>EcAP2/ERF42</i>  | <i>EcAP2/ERF41</i>  |                   |  |
| Eca_sc003794.1 | <i>EcAP2/ERF8</i>   |                     |                   |  |
| Eca_sc003893.1 | <i>EcAP2/ERF59</i>  |                     |                   |  |
| Eca_sc003926.1 | <i>EcAP2/ERF77</i>  |                     |                   |  |
| Eca_sc004205.1 | <i>EcAP2/ERF109</i> |                     |                   |  |
| Eca_sc004328.1 | <i>EcAP2/ERF101</i> |                     |                   |  |
| Eca_sc004486.1 | <i>EcAP2/ERF72</i>  | <i>EcAP2/ERF18</i>  |                   |  |
| Eca_sc005351.1 | <i>EcAP2/ERF112</i> |                     |                   |  |
| Eca_sc005409.1 | <i>EcAP2/ERF111</i> |                     |                   |  |
| Eca_sc006292.1 | <i>EcAP2/ERF3</i>   | <i>EcAP2/ERF4</i>   | <i>EcAP2/ERF2</i> |  |
| Eca_sc006305.1 | <i>EcAP2/ERF36</i>  |                     |                   |  |
| Eca_sc007884.1 | <i>EcAP2/ERF35</i>  |                     |                   |  |
| Eca_sc010606.1 | <i>EcAP2/ERF51</i>  |                     |                   |  |
| Eca_sc010932.1 | <i>EcAP2/ERF40</i>  |                     |                   |  |
| Eca_sc011255.1 | <i>EcAP2/ERF34</i>  |                     |                   |  |
| Eca_sc013037.1 | <i>EcAP2/ERF62</i>  |                     |                   |  |
| Eca_sc014577.1 | <i>EcAP2/ERF30</i>  |                     |                   |  |
| Eca_sc183659.1 | <i>EcAP2/ERF16</i>  |                     |                   |  |
| Eca_sc184725.1 | <i>EcAP2/ERF33</i>  |                     |                   |  |
| Eca_sc184896.1 | <i>EcAP2/ERF121</i> |                     |                   |  |



|                |                     |                    |                    |  |
|----------------|---------------------|--------------------|--------------------|--|
| Eca_sc186325.1 | <i>EcAP2/ERF15</i>  |                    |                    |  |
| Eca_sc186764.1 | <i>EcAP2/ERF132</i> |                    |                    |  |
| Eca_sc186929.1 | <i>EcAP2/ERF89</i>  |                    |                    |  |
| Eca_sc194094.1 | <i>EcAP2/ERF23</i>  | <i>EcAP2/ERF24</i> |                    |  |
| Eca_sc194316.1 | <i>EcAP2/ERF17</i>  |                    |                    |  |
| Eca_sc194480.1 | <i>EcAP2/ERF126</i> |                    |                    |  |
| Eca_sc194483.1 | <i>EcAP2/ERF58</i>  |                    |                    |  |
| Eca_sc194486.1 | <i>EcAP2/ERF21</i>  | <i>EcAP2/ERF20</i> | <i>EcAP2/ERF22</i> |  |
| Eca_sc194541.1 | <i>EcAP2/ERF69</i>  | <i>EcAP2/ERF68</i> |                    |  |
| Eca_sc194561.1 | <i>EcAP2/ERF61</i>  |                    |                    |  |
| Eca_sc194565.1 | <i>EcAP2/ERF71</i>  |                    |                    |  |
| Eca_sc194570.1 | <i>EcAP2/ERF93</i>  |                    |                    |  |
| Eca_sc194602.1 | <i>EcAP2/ERF79</i>  |                    |                    |  |
| Eca_sc194610.1 | <i>EcAP2/ERF64</i>  |                    |                    |  |
| Eca_sc194615.1 | <i>EcAP2/ERF25</i>  |                    |                    |  |
| Eca_sc194620.1 | <i>EcAP2/ERF70</i>  |                    |                    |  |
| Eca_sc194641.1 | <i>EcAP2/ERF14</i>  | <i>EcAP2/ERF11</i> | <i>EcAP2/ERF12</i> |  |
| Eca_sc194665.1 | <i>EcAP2/ERF102</i> |                    |                    |  |
| Eca_sc194668.1 | <i>EcAP2/ERF48</i>  | <i>EcAP2/ERF50</i> | <i>EcAP2/ERF49</i> |  |
| Eca_sc194672.1 | <i>EcAP2/ERF115</i> |                    |                    |  |
| Eca_sc194674.1 | <i>EcAP2/ERF9</i>   |                    |                    |  |
| Eca_sc194677.1 | <i>EcAP2/ERF66</i>  |                    |                    |  |
| Eca_sc194689.1 | <i>EcAP2/ERF5</i>   |                    |                    |  |

Eca\_sc194692.1 *EcAP2/ERF29*  
Eca\_sc194696.1 *EcAP2/ERF47* *EcAP2/ERF46*  
Eca\_sc194697.1 *EcAP2/ERF13*  
Eca\_sc194713.1 *EcAP2/ERF63*  
Eca\_sc194718.1 *EcAP2/ERF55*  
Eca\_sc194732.1 *EcAP2/ERF31*  
Eca\_sc194755.1 *EcAP2/ERF38*  
Eca\_sc194756.1 *EcAP2/ERF88*  
Eca\_sc194794.1 *EcAP2/ERF32*

---

## Supplementary Table S4

### Validation of *AP2/ERF* transcription factors of *E. californica* by BLAST.

| Name               | Protein length | BLASTn, <i>Eschscholzia californica</i> (using Phytometasyn database) | E-value | Predicted protein length | BLASTx, <i>Arabidopsis thaliana</i>             | E-value | Protein length | BLASTx, other BIA-producing plants                                                                          | E-value | Protein length |
|--------------------|----------------|-----------------------------------------------------------------------|---------|--------------------------|-------------------------------------------------|---------|----------------|-------------------------------------------------------------------------------------------------------------|---------|----------------|
| <b>EcAP2/ERF1</b>  | 222            | MAGPIE:eca_ECARTPF1_assembled--<br>ECARTPF1_rep_c19853                | 0       | 222                      | ethylene responsive element binding factor<br>1 | 2E-35   | 266            | ethylene-responsive transcription factor 1-like [Papaver<br>somniferum]                                     | 2E-28   | 273            |
| <b>EcAP2/ERF2</b>  | 322            | MAGPIE:eca_ECARTPF1_assembled--<br>ECARTPF1_rep_c166                  | 0       | 322                      | ethylene responsive element binding factor<br>5 | 4E-27   | 300            | AP2/ERF domain [Macleaya cordata]                                                                           | 8E-51   | 345            |
| <b>EcAP2/ERF3</b>  | 303            | MAGPIE:eca_ECARTPF1_assembled--<br>ECARTPF1_rep_c512                  | 0       | 305                      | ethylene responsive element binding factor<br>5 | 2E-29   | 300            | AP2/ERF domain [Macleaya cordata]                                                                           | 2E-55   | 356            |
| <b>EcAP2/ERF4</b>  | 301            | MAGPIE:eca_ECARTPF1_assembled--<br>ECARTPF1_rep_c196                  | 0       | 303                      | ethylene responsive element binding factor<br>5 | 4E-25   | 300            | AP2/ERF domain [Macleaya cordata]                                                                           | 5E-51   | 345            |
| <b>EcAP2/ERF5</b>  | 230            | MAGPIE:eca_ECARTPF1_Velvet--<br>Contig12874                           | 0       | 162                      | hypothetical protein AXX17_AT4G14710            | 1E-40   | 223            | PREDICTED: ethylene-responsive transcription factor-like<br>protein At4g13040 isoform X2 [Nelumbo nucifera] | 7E-82   | 232            |
| <b>EcAP2/ERF6</b>  | 188            | MAGPIE:eca_ECARTPF1_Velvet--<br>Contig19883                           | 0       | 185                      | ethylene responsive element binding factor<br>2 | 8E-27   | 243            | AP2/ERF domain [Macleaya cordata]                                                                           | 4E-47   | 186            |
| <b>EcAP2/ERF7</b>  | 376            | MAGPIE:eca_ECARTPF1_Velvet--<br>Contig12079                           | 7E-25   | 351                      | cytokinin response factor 4                     | 1E-42   | 335            | PREDICTED: ethylene-responsive transcription factor CRF3<br>[Nelumbo nucifera]                              | 5E-58   | 328            |
| <b>EcAP2/ERF8</b>  | 312            | MAGPIE:eca_ECARTPF1_Velvet--<br>Contig26026                           | 0       | 312                      | ethylene responsive element binding factor<br>5 | 3E-36   | 300            | AP2/ERF domain [Macleaya cordata]                                                                           | 3E-81   | 345            |
| <b>EcAP2/ERF9</b>  | 145            | MAGPIE:eca_ECARTPF1_Velvet--<br>Contig3216                            | 2E-33   | 445                      | SHN2                                            | 1E-22   | 187            | AP2/ERF domain [Macleaya cordata]                                                                           | 3E-56   | 148            |
| <b>EcAP2/ERF10</b> | 271            | MAGPIE:eca_ECARTPF1_Velvet--<br>Contig19629                           | 0       | 271                      | ethylene responsive element binding factor<br>6 | 9E-37   | 282            | AP2/ERF domain [Macleaya cordata]                                                                           | 6E-76   | 345            |
| <b>EcAP2/ERF11</b> | 133            | MAGPIE:eca_ECARTPF1_Velvet--<br>Singlet5881                           | 0       | 133                      | TDR1                                            | 8E-23   | 139            | AP2/ERF domain [Macleaya cordata]                                                                           | 6E-27   | 136            |
| <b>EcAP2/ERF12</b> | 214            | MAGPIE:eca_ECARTPF1_Velvet--<br>Contig27317                           | 0       | 214                      | ethylene response factor 1                      | 9E-50   | 218            | PREDICTED: ethylene-responsive transcription factor 1B-like<br>[Nelumbo nucifera]                           | 1E-68   | 230            |
| <b>EcAP2/ERF13</b> | 439            | MAGPIE:eca_ECARTPF1_Velvet--<br>Contig25305                           | 0       | 415                      | putative AP2 domain transcription factor        | 7E-103  | 423            | AP2-like ethylene-responsive transcription factor At2g41710<br>[Papaver somniferum]                         | 4E-158  | 440            |

|                    |     |                                                        |        |     |                                                   |        |     |                                                                                  |        |     |
|--------------------|-----|--------------------------------------------------------|--------|-----|---------------------------------------------------|--------|-----|----------------------------------------------------------------------------------|--------|-----|
| <b>EcAP2/ERF14</b> | 199 | MAGPIE:eca_ECARTPF1_assembled--<br>ECARTPF1_rep_c10870 | 0      | 201 | ethylene response factor 7                        | 3E-24  | 244 | AP2/ERF domain [Macleaya cordata]                                                | 1E-47  | 229 |
| <b>EcAP2/ERF15</b> | 367 | MAGPIE:eca_ECARTPF1_Velvet--<br>Contig5418             | 1E-173 | 389 | FLO2                                              | 7E-104 | 432 | AP2/ERF domain [Macleaya cordata]                                                | 3E-131 | 496 |
| <b>EcAP2/ERF16</b> | 275 | MAGPIE:eca_ECARTPF1_Velvet--<br>Singlet43578           | 0      | 275 | ethylene response factor ERF1                     | 9E-22  | 218 | AP2/ERF domain [Macleaya cordata]                                                | 2E-116 | 275 |
| <b>EcAP2/ERF17</b> | 221 | MAGPIE:eca_ECARTPF1_Velvet--<br>Contig23624            | 0      | 221 | ethylene response factor 1                        | 8E-55  | 218 | AP2/ERF domain [Macleaya cordata]                                                | 4E-88  | 217 |
| <b>EcAP2/ERF18</b> | 296 | MAGPIE:eca_ECARTPF1_assembled--<br>ECARTPF1_rep_c1664  | 0      | 295 | ethylene responsive element binding factor<br>1   | 2E-30  | 268 | AP2/ERF domain [Macleaya cordata]                                                | 5E-72  | 324 |
| <b>EcAP2/ERF19</b> | 211 | MAGPIE:eca_ECARTPF1_Velvet--<br>Contig5077             | 0      | 211 | ethylene response factor 1                        | 2E-70  | 218 | AP2/ERF domain [Macleaya cordata]                                                | 7E-80  | 216 |
| <b>EcAP2/ERF20</b> | 267 | MAGPIE:eca_ECARTPF1_Velvet--<br>Contig28396            | 0      | 266 | Integrase-type DNA-binding superfamily<br>protein | 4E-33  | 263 | PREDICTED: ethylene-responsive transcription factor<br>ERF113 [Nelumbo nucifera] | 4E-46  | 329 |
| <b>EcAP2/ERF21</b> | 306 | MAGPIE:eca_ECARTPF1_Velvet--<br>Singlet43578           | 9E-23  | 275 | putative AP2/EREBP transcription factor           | 1E-27  | 245 | AP2/ERF domain [Macleaya cordata]                                                | 9E-66  | 318 |
| <b>EcAP2/ERF22</b> | 365 | MAGPIE:eca_ECARTPF1_Velvet--<br>Contig3480             | 0      | 349 | AP2/B3 transcription factor family protein        | 5E-97  | 352 | AP2/ERF domain [Macleaya cordata]                                                | 1E-149 | 389 |
| <b>EcAP2/ERF23</b> | 274 | MAGPIE:eca_ECARTPF1_Velvet--<br>Contig8796             | 0      | 274 | RAP2.3                                            | 3E-43  | 246 | AP2/ERF domain [Macleaya cordata]                                                | 2E-86  | 264 |
| <b>EcAP2/ERF24</b> | 442 | MAGPIE:eca_ECARTPF1_assembled--<br>ECARTPF1_rep_c792   | 0      | 327 | AP2 domain containing protein, putative           | 2E-26  | 358 | uncharacterized protein LOC113316800 isoform X3 [Papaver<br>sommiferum]          | 5E-65  | 410 |
| <b>EcAP2/ERF25</b> | 154 | MAGPIE:eca_ECARTPF1_Velvet--<br>Contig25136            | 4E-11  | 227 | Integrase-type DNA-binding superfamily<br>protein | 3E-30  | 219 | AP2/ERF domain [Macleaya cordata]                                                | 3E-38  | 150 |
| <b>EcAP2/ERF26</b> | 286 | MAGPIE:eca_ECARTPF1_assembled--<br>ECARTPF1_rep_c498   | 0      | 286 | RRTF1                                             | 2E-25  | 268 | ethylene-responsive transcription factor ERF109-like<br>[Papaver somniferum]     | 3E-44  | 289 |
| <b>EcAP2/ERF27</b> | 246 | MAGPIE:eca_ECARTPF1_Velvet--<br>Contig15974            | 0      | 246 | CRF4                                              | 3E-20  | 335 | AP2/ERF domain [Macleaya cordata]                                                | 5E-67  | 254 |
| <b>EcAP2/ERF28</b> | 317 | MAGPIE:eca_ECARTPF1_Velvet--<br>Contig28265            | 1E-59  | 355 | Integrase-type DNA-binding superfamily<br>protein | 1E-34  | 298 | hypothetical protein AQUCO_03000214v1 [Aquilegia<br>coerulea]                    | 6E-43  | 323 |
| <b>EcAP2/ERF29</b> | 338 | MAGPIE:eca_ECARTPF1_Velvet--<br>Singlet30412           | 0      | 337 | Integrase-type DNA-binding superfamily<br>protein | 3E-16  | 262 | ethylene-responsive transcription factor ERF118-like<br>[Papaver somniferum]     | 4E-48  | 388 |

|                    |     |                                                       |         |     |                                                   |       |     |                                                                                          |        |     |
|--------------------|-----|-------------------------------------------------------|---------|-----|---------------------------------------------------|-------|-----|------------------------------------------------------------------------------------------|--------|-----|
| <b>EcAP2/ERF30</b> | 184 | MAGPIE:eca_ECARTPF1_Velvet--<br>Contig23909           | 1E-12   | 186 | ERF domain protein 10                             | 7E-14 | 245 | PREDICTED: ethylene-responsive transcription factor 9-like<br>[Nelumbo nucifera]         | 1E-11  | 175 |
| <b>EcAP2/ERF31</b> | 295 | MAGPIE:eca_ECARTPF1_Velvet--<br>Singlet39940          | 7E-24   | 169 | putative AP2/EREBP transcription factor           | 7E-32 | 245 | AP2/ERF domain [Macleaya cordata]                                                        | 1E-74  | 318 |
| <b>EcAP2/ERF32</b> | 362 | MAGPIE:eca_ECARTPF1_Velvet--<br>Contig23931           | 0       | 265 | related to AP2.7                                  | 2E-47 | 283 | AP2/ERF domain [Macleaya cordata]                                                        | 6E-88  | 517 |
| <b>EcAP2/ERF33</b> | 169 | MAGPIE:eca_ECARTPF1_Velvet--<br>Singlet39940          | 0       | 169 | ERF domain protein 12                             | 6E-35 | 189 | PREDICTED: ethylene-responsive transcription factor 12-like<br>[Nelumbo nucifera]        | 7E-45  | 157 |
| <b>EcAP2/ERF34</b> | 181 | MAGPIE:eca_ECARTPF1_Velvet--<br>Singlet44397          | 1E-12   | 112 | Integrase-type DNA-binding superfamily<br>protein | 2E-33 | 187 | AP2/ERF domain [Macleaya cordata]                                                        | 1E-72  | 184 |
| <b>EcAP2/ERF35</b> | 433 | MAGPIE:eca_ECARTPF1_assembled--<br>ECARTPF1_rep_c1798 | 0       | 416 | RAP2.4                                            | 4E-41 | 261 | AP2/ERF domain [Macleaya cordata]                                                        | 4E-90  | 379 |
| <b>EcAP2/ERF36</b> | 353 | MAGPIE:eca_ECARTPF1_assembled--<br>ECARTPF1_rep_c609  | 0       | 375 | AP2 domain containing protein, putative           | 6E-47 | 358 | AP2/ERF domain [Macleaya cordata]                                                        | 1E-134 | 421 |
| <b>EcAP2/ERF37</b> | 406 | MAGPIE:eca_ECARTPF1_Velvet--<br>Contig10577           | 0       | 408 | ERF53                                             | 6E-45 | 336 | AP2/ERF domain [Macleaya cordata]                                                        | 1E-134 | 405 |
| <b>EcAP2/ERF38</b> | 384 | MAGPIE:eca_ECARTPF1_Velvet--<br>Contig27210           | 0       | 384 | related to AP2 2                                  | 2E-61 | 374 | ethylene-responsive transcription factor RAP2-12-like isoform<br>X2 [Papaver somniferum] | 1E-142 | 396 |
| <b>EcAP2/ERF39</b> | 261 | MAGPIE:eca_ECARTPF1_Velvet--<br>Contig28418           | 0       | 279 | putative AP2/EREBP transcription factor           | 1E-19 | 334 | AP2/ERF domain [Macleaya cordata]                                                        | 2E-92  | 254 |
| <b>EcAP2/ERF40</b> | 325 | MAGPIE:eca_ECARTPF1_assembled--<br>ECARTPF1_c15764    | 0.00008 | 211 | WR11                                              | 1E-29 | 365 | hypothetical protein AQUCO_07400065v1 [Aquilegia<br>coerulea]                            | 3E-27  | 337 |
| <b>EcAP2/ERF41</b> | 210 | MAGPIE:eca_ECARTPF1_assembled--<br>ECARTPF1_rep_c6774 | 0       | 211 | AP2 domain containing protein RAP2.5              | 1E-18 | 213 | AP2/ERF domain [Macleaya cordata]                                                        | 2E-20  | 225 |
| <b>EcAP2/ERF42</b> | 231 | MAGPIE:eca_ECARTPF1_Velvet--<br>Contig28549           | 0       | 233 | ERF3                                              | 3E-32 | 225 | PREDICTED: ethylene-responsive transcription factor 3-like<br>[Nelumbo nucifera]         | 1E-36  | 235 |
| <b>EcAP2/ERF43</b> | 235 | MAGPIE:eca_ECARTPF1_assembled--<br>ECARTPF1_rep_c4506 | 0       | 237 | ERF9                                              | 2E-22 | 200 | ethylene-responsive transcription factor 4-like [Papaver<br>somniferum]                  | 1E-26  | 271 |
| <b>EcAP2/ERF44</b> | 376 | MAGPIE:eca_ECARTPF1_Velvet--<br>Singlet31422          | 0       | 376 | WIND1                                             | 6E-39 | 333 | AP2/ERF domain [Macleaya cordata]                                                        | 7E-58  | 409 |
| <b>EcAP2/ERF45</b> | 349 | MAGPIE:eca_ECARTPF1_Velvet--<br>Contig12079           | 0       | 351 | cytokinin response factor 2                       | 4E-36 | 343 | AP2/ERF domain [Macleaya cordata]                                                        | 3E-75  | 344 |

|                    |     |                                                       |       |     |                                                   |        |     |                                                                                          |        |     |
|--------------------|-----|-------------------------------------------------------|-------|-----|---------------------------------------------------|--------|-----|------------------------------------------------------------------------------------------|--------|-----|
| <b>EcAP2/ERF46</b> | 379 | MAGPIE:eca_ECARTPF1_Velvet--<br>Contig26952           | 2E-13 | 256 | DORNROSCHEN-like protein                          | 1E-11  | 306 | ethylene-responsive transcription factor ESR1-like                                       | 1E-24  | 449 |
| <b>EcAP2/ERF47</b> | 368 | MAGPIE:eca_ECARTPF1_Velvet--<br>Singlet42715          | 0     | 368 | AP2/B3 transcription factor family protein        | 8E-127 | 361 | AP2/ERF domain [Macleaya cordata]                                                        | 3E-180 | 359 |
| <b>EcAP2/ERF48</b> | 247 | MAGPIE:eca_ECARTPF1_assembled--<br>ECARTPF1_rep_c1273 | 0     | 248 | ERF9                                              | 1E-22  | 200 | AP2/ERF domain [Macleaya cordata]                                                        | 2E-46  | 242 |
| <b>EcAP2/ERF49</b> | 218 | MAGPIE:eca_ECARTPF1_Velvet--<br>Contig12500           | 0     | 220 | Integrase-type DNA-binding superfamily<br>protein | 6E-34  | 185 | AP2/ERF domain [Macleaya cordata]                                                        | 4E-46  | 229 |
| <b>EcAP2/ERF50</b> | 235 | MAGPIE:eca_ECARTPF1_Velvet--<br>Contig26015           | 0     | 238 | putative AP2 domain transcription factor          | 4E-46  | 295 | ethylene-responsive transcription factor ERF039-like<br>[Papaver somniferum]             | 9E-61  | 252 |
| <b>EcAP2/ERF51</b> | 426 | MAGPIE:eca_ECARTPF1_Velvet--<br>Contig26952           | 9E-12 | 256 | DORNROSCHEN-like protein                          | 1E-11  | 306 | AP2/ERF domain [Macleaya cordata]                                                        | 7E-20  | 469 |
| <b>EcAP2/ERF52</b> | 224 | MAGPIE:eca_ECARTPF1_assembled--<br>ECARTPF1_rep_c2226 | 0     | 234 | ERF9                                              | 6E-23  | 200 | AP2/ERF domain [Macleaya cordata]                                                        | 3E-45  | 242 |
| <b>EcAP2/ERF53</b> | 353 | MAGPIE:eca_ECARTPF1_Velvet--<br>Contig12079           | 3E-29 | 351 | cytokinin response factor 4                       | 3E-44  | 335 | PREDICTED: ethylene-responsive transcription factor CRF1-<br>like [Nelumbo nucifera]     | 2E-56  | 339 |
| <b>EcAP2/ERF54</b> | 370 | MAGPIE:eca_ECARTPF1_Velvet--<br>Contig10421           | 0     | 370 | AP2/B3 transcription factor family protein        | 9E-137 | 361 | AP2/ERF domain [Macleaya cordata]                                                        | 1E-167 | 387 |
| <b>EcAP2/ERF55</b> | 377 | MAGPIE:eca_ECARTPF1_Velvet--<br>Contig5077            | 7E-19 | 211 | Integrase-type DNA-binding superfamily<br>protein | 2E-44  | 348 | ethylene-responsive transcription factor ERF086-like<br>[Papaver somniferum]             | 9E-109 | 368 |
| <b>EcAP2/ERF56</b> | 361 | MAGPIE:eca_ECARTPF1_Velvet--<br>Contig8599            | 0     | 367 | AP2 domain containing protein, putative           | 3E-69  | 358 | ethylene-responsive transcription factor RAP2-12-like isoform<br>X2 [Papaver somniferum] | 1E-147 | 396 |
| <b>EcAP2/ERF57</b> | 221 | MAGPIE:eca_ECARTPF1_assembled--<br>ECARTPF1_rep_c2401 | 0     | 206 | ethylene responsive element binding factor<br>3   | 8E-22  | 225 | AP2/ERF domain [Macleaya cordata]                                                        | 1E-28  | 225 |
| <b>EcAP2/ERF58</b> | 193 | MAGPIE:eca_ECARTPF1_Velvet--<br>Contig23909           | 2E-28 | 186 | AP2 domain containing protein RAP2.5              | 8E-27  | 213 | ethylene-responsive transcription factor 12-like [Papaver<br>somniferum]                 | 1E-23  | 232 |
| <b>EcAP2/ERF59</b> | 281 | MAGPIE:eca_ECARTPF1_Velvet--<br>Singlet31787          | 0     | 280 | Integrase-type DNA-binding superfamily<br>protein | 6E-32  | 335 | AP2/ERF domain [Macleaya cordata]                                                        | 3E-76  | 291 |
| <b>EcAP2/ERF60</b> | 143 | MAGPIE:eca_ECARTPF1_Velvet--<br>Singlet12614          | 0.06  | 228 | Integrase-type DNA-binding superfamily<br>protein | 7E-10  | 219 | AP2/ERF domain [Macleaya cordata]                                                        | 2E-07  | 150 |
| <b>EcAP2/ERF61</b> | 218 | MAGPIE:eca_ECARTPF1_Velvet--<br>Singlet8824           | 2E-17 | 254 | hypothetical protein AXX17_AT1G75430              | 5E-21  | 255 | AP2/ERF domain [Macleaya cordata]                                                        | 4E-31  | 295 |

|                    |     |                                                       |        |     |                                                |       |     |                                                                                      |        |     |
|--------------------|-----|-------------------------------------------------------|--------|-----|------------------------------------------------|-------|-----|--------------------------------------------------------------------------------------|--------|-----|
| <b>EcAP2/ERF62</b> | 346 | MAGPIE:eca_ECARTPF1_Velvet--<br>Contig12079           | 9E-30  | 351 | cytokinin response factor 4                    | 5E-39 | 335 | PREDICTED: ethylene-responsive transcription factor CRF1-like [Nelumbo nucifera]     | 9E-53  | 339 |
| <b>EcAP2/ERF63</b> | 415 | MAGPIE:eca_ECARTPF1_Velvet--<br>Singlet31787          | 3E-36  | 281 | Integrase-type DNA-binding superfamily protein | 1E-34 | 388 | ethylene-responsive transcription factor ERF062-like [Papaver somniferum]            | 8E-57  | 432 |
| <b>EcAP2/ERF64</b> | 231 | MAGPIE:eca_ECARTPF1_Velvet--<br>Singlet37091          | 5E-37  | 281 | Integrase-type DNA-binding superfamily protein | 1E-39 | 206 | PREDICTED: dehydration-responsive element-binding protein 2C-like [Nelumbo nucifera] | 1E-38  | 204 |
| <b>EcAP2/ERF65</b> | 194 | MAGPIE:eca_ECARTPF1_assembled--<br>ECARTPF1_rep_c3880 | 1E-17  | 155 | Integrase-type DNA-binding superfamily protein | 1E-40 | 181 | PREDICTED: ethylene-responsive transcription factor ERF003-like [Nelumbo nucifera]   | 3E-61  | 187 |
| <b>EcAP2/ERF66</b> | 192 | MAGPIE:eca_ECARTPF1_Velvet--<br>Contig12709           | 0      | 152 | DREB and EAR motif protein 2                   | 1E-43 | 184 | AP2/ERF domain [Macleaya cordata]                                                    | 2E-56  | 196 |
| <b>EcAP2/ERF67</b> | 150 | MAGPIE:eca_ECARTPF1_Velvet--<br>Contig18746           | 0      | 175 | DEAR2                                          | 2E-49 | 184 | AP2/ERF domain [Macleaya cordata]                                                    | 4E-65  | 142 |
| <b>EcAP2/ERF68</b> | 193 | MAGPIE:eca_ECARTPF1_Velvet--<br>Contig4816            | 0      | 205 | Integrase-type DNA-binding superfamily protein | 6E-45 | 183 | ethylene-responsive transcription factor ERF021-like [Papaver somniferum]            | 2E-65  | 194 |
| <b>EcAP2/ERF69</b> | 272 | MAGPIE:eca_ECARTPF1_Velvet--<br>Singlet43578          | 2E-18  | 275 | Integrase-type DNA-binding superfamily protein | 3E-34 | 211 | PREDICTED: ethylene-responsive transcription factor LEP-like [Nelumbo nucifera]      | 5E-48  | 275 |
| <b>EcAP2/ERF70</b> | 180 | MAGPIE:eca_ECARTPF1_Velvet--<br>Contig4816            | 3E-39  | 205 | Integrase-type DNA-binding superfamily protein | 4E-45 | 183 | AP2/ERF domain [Macleaya cordata]                                                    | 2E-72  | 186 |
| <b>EcAP2/ERF71</b> | 233 | MAGPIE:eca_ECARTPF1_Velvet--<br>Contig11049           | 2E-100 | 235 | TINY2                                          | 5E-54 | 236 | PREDICTED: dehydration-responsive element-binding protein 3-like [Nelumbo nucifera]  | 4E-76  | 237 |
| <b>EcAP2/ERF72</b> | 477 | MAGPIE:eca_ECARTPF1_assembled--<br>ECARTPF1_rep_c1195 | 0      | 478 | related to AP2.7                               | 1E-89 | 464 | floral homeotic protein APETALA 2-like isoform X1 [Papaver somniferum]               | 8E-124 | 516 |
| <b>EcAP2/ERF73</b> | 240 | MAGPIE:eca_ECARTPF1_Velvet--<br>Contig11050           | 0      | 235 | Integrase-type DNA-binding superfamily protein | 4E-58 | 236 | ethylene-responsive transcription factor ERF043-like [Papaver somniferum]            | 4E-74  | 253 |
| <b>EcAP2/ERF74</b> | 292 | MAGPIE:eca_ECARTPF1_Velvet--<br>Singlet32235          | 0      | 284 | TINY2                                          | 6E-62 | 236 | AP2/ERF domain [Macleaya cordata]                                                    | 5E-88  | 246 |
| <b>EcAP2/ERF75</b> | 267 | MAGPIE:eca_ECARTPF1_Velvet--<br>Contig11048           | 0      | 267 | Integrase-type DNA-binding superfamily protein | 5E-64 | 236 | PREDICTED: dehydration-responsive element-binding protein 3-like [Nelumbo nucifera]  | 3E-73  | 237 |
| <b>EcAP2/ERF76</b> | 201 | MAGPIE:eca_ECARTPF1_Velvet--<br>Contig22485           | 2E-21  | 226 | Integrase-type DNA-binding superfamily protein | 1E-43 | 184 | AP2/ERF domain [Macleaya cordata]                                                    | 4E-63  | 203 |
| <b>EcAP2/ERF77</b> | 238 | MAGPIE:eca_ECARTPF1_Velvet--<br>Contig26015           | 0      | 238 | hypothetical protein AXX17_AT2G42530           | 3E-47 | 295 | AP2/ERF domain [Macleaya cordata]                                                    | 7E-69  | 255 |

|                    |     |                                                       |       |     |                                                                  |        |     |                                                                                       |        |     |
|--------------------|-----|-------------------------------------------------------|-------|-----|------------------------------------------------------------------|--------|-----|---------------------------------------------------------------------------------------|--------|-----|
| <b>EcAP2/ERF78</b> | 251 | MAGPIE:eca_ECARTPF1_Velvet--<br>Contig11048           | 1E-44 | 267 | Integrase-type DNA-binding superfamily<br>protein                | 1E-39  | 218 | ethylene-responsive transcription factor ERF039-like<br>[Papaver somniferum]          | 6E-48  | 252 |
| <b>EcAP2/ERF79</b> | 184 | MAGPIE:eca_ECARTPF1_assembled--<br>ECARTPF1_c5787     | 0     | 184 | Similar to transcription factor TINY                             | 1E-53  | 187 | AP2/ERF domain [Macleaya cordata]                                                     | 7E-68  | 179 |
| <b>EcAP2/ERF80</b> | 173 | MAGPIE:eca_ECARTPF1_assembled--<br>ECARTPF1_rep_c1061 | 2E-14 | 383 | Integrase-type DNA-binding superfamily<br>protein                | 2E-36  | 181 | PREDICTED: ethylene-responsive transcription factor<br>ERF003-like [Nelumbo nucifera] | 8E-45  | 187 |
| <b>EcAP2/ERF81</b> | 153 | MAGPIE:eca_ECARTPF1_Velvet--<br>Contig9805            | 0     | 153 | DEAR2                                                            | 4E-48  | 184 | AP2/ERF domain [Macleaya cordata]                                                     | 1E-80  | 142 |
| <b>EcAP2/ERF82</b> | 511 | MAGPIE:eca_ECARTPF1_Velvet--<br>Contig25908           | 0     | 512 | related to AP2.7                                                 | 1E-106 | 464 | floral homeotic protein APETALA 2-like isoform X1 [Papaver<br>somniferum]             | 9E-163 | 536 |
| <b>EcAP2/ERF83</b> | 233 | MAGPIE:eca_ECARTPF1_assembled--<br>ECARTPF1_rep_c3664 | 0     | 233 | CRT/DRE binding factor 2                                         | 6E-71  | 216 | AP2/ERF domain [Macleaya cordata]                                                     | 3E-97  | 228 |
| <b>EcAP2/ERF84</b> | 245 | MAGPIE:eca_ECARTPF1_Velvet--<br>Contig11460           | 0     | 238 | C-repeat-binding factor 4                                        | 4E-63  | 224 | dehydration-responsive element-binding protein 1A-like<br>[Papaver somniferum]        | 2E-80  | 228 |
| <b>EcAP2/ERF85</b> | 205 | MAGPIE:eca_ECARTPF1_Velvet--<br>Contig11458           | 0     | 230 | C-repeat-binding factor 4                                        | 6E-59  | 224 | AP2/ERF domain [Macleaya cordata]                                                     | 2E-86  | 228 |
| <b>EcAP2/ERF86</b> | 233 | MAGPIE:eca_ECARTPF1_Velvet--<br>Contig11460           | 0     | 238 | C-repeat-binding factor 4                                        | 2E-67  | 224 | dehydration-responsive element-binding protein 1A-like<br>[Papaver somniferum]        | 1E-79  | 228 |
| <b>EcAP2/ERF87</b> | 254 | MAGPIE:eca_ECARTPF1_assembled--<br>ECARTPF1_rep_c42   | 0     | 255 | RecName: Full=Ethylene-responsive<br>transcription factor ERF026 | 4E-23  | 248 | AP2/ERF domain [Macleaya cordata]                                                     | 2E-41  | 242 |
| <b>EcAP2/ERF88</b> | 275 | MAGPIE:eca_ECARTPF1_Velvet--<br>Contig13517           | 0     | 280 | Integrase-type DNA-binding superfamily<br>protein                | 1E-28  | 244 | ethylene-responsive transcription factor ERF014-like<br>[Papaver somniferum]          | 1E-29  | 297 |
| <b>EcAP2/ERF89</b> | 280 | MAGPIE:eca_ECARTPF1_Velvet--<br>Contig14796           | 0     | 271 | Integrase-type DNA-binding superfamily<br>protein                | 2E-28  | 244 | ethylene-responsive transcription factor ERF014-like<br>[Papaver somniferum]          | 2E-29  | 298 |
| <b>EcAP2/ERF90</b> | 250 | MAGPIE:eca_ECARTPF1_Velvet--<br>Contig26777           | 0     | 250 | Integrase-type DNA-binding superfamily<br>protein                | 1E-27  | 230 | PREDICTED: ethylene-responsive transcription factor<br>ERF014-like [Nelumbo nucifera] | 6E-30  | 221 |
| <b>EcAP2/ERF91</b> | 204 | MAGPIE:eca_ECARTPF1_Velvet--<br>Contig26235           | 2E-28 | 257 | HRD                                                              | 2E-36  | 184 | AP2/ERF domain [Macleaya cordata]                                                     | 5E-50  | 183 |
| <b>EcAP2/ERF92</b> | 217 | MAGPIE:eca_ECARTPF1_Velvet--<br>Contig22213           | 2E-93 | 172 | C-repeat-binding factor 4                                        | 1E-41  | 224 | dehydration-responsive element-binding protein 1F-like<br>[Papaver somniferum]        | 2E-59  | 228 |
| <b>EcAP2/ERF93</b> | 203 | MAGPIE:eca_ECARTPF1_assembled--<br>ECARTPF1_rep_c9901 | 0     | 203 | RecName: Full=Ethylene-responsive<br>transcription factor ERF026 | 7E-24  | 248 | AP2/ERF domain [Macleaya cordata]                                                     | 2E-34  | 242 |



|                     |     |                                                     |       |     |                                                   |        |     |                                                                                           |        |     |
|---------------------|-----|-----------------------------------------------------|-------|-----|---------------------------------------------------|--------|-----|-------------------------------------------------------------------------------------------|--------|-----|
| <b>EcAP2/ERF94</b>  | 278 | MAGPIE:eca_ECARTPF1_Velvet--<br>Singlet37091        | 3E-40 | 326 | Integrase-type DNA-binding superfamily<br>protein | 2E-73  | 277 | AP2/ERF domain [Macleaya cordata]                                                         | 2E-129 | 285 |
| <b>EcAP2/ERF95</b>  | 326 | MAGPIE:eca_ECARTPF1_Velvet--<br>Singlet42615        | 0     | 327 | CRF1                                              | 4E-17  | 289 | AP2/ERF domain [Macleaya cordata]                                                         | 9E-49  | 349 |
| <b>EcAP2/ERF96</b>  | 219 | MAGPIE:eca_ECARTPF1_assembled--<br>ECARTPF1_rep_c98 | 0     | 219 | C-repeat binding factor 3                         | 1E-51  | 216 | dehydration-responsive element-binding protein 1C-like<br>[Papaver somniferum]            | 3E-67  | 243 |
| <b>EcAP2/ERF97</b>  | 213 | MAGPIE:eca_ECARTPF1_Velvet--<br>Singlet31552        | 0     | 233 | C-repeat binding factor 2                         | 3E-57  | 216 | AP2/ERF domain [Macleaya cordata]                                                         | 2E-81  | 228 |
| <b>EcAP2/ERF98</b>  | 193 | MAGPIE:eca_ECARTPF1_Velvet--<br>Contig11850         | 3E-13 | 254 | Integrase-type DNA-binding superfamily<br>protein | 2E-66  | 199 | AP2/ERF domain [Macleaya cordata]                                                         | 2E-89  | 200 |
| <b>EcAP2/ERF99</b>  | 205 | MAGPIE:eca_ECARTPF1_Velvet--<br>Contig21023         | 0     | 237 | C-repeat-binding factor 4                         | 4E-61  | 224 | AP2/ERF domain [Macleaya cordata]                                                         | 4E-83  | 228 |
| <b>EcAP2/ERF100</b> | 232 | MAGPIE:eca_ECARTPF1_Velvet--<br>Singlet31553        | 0     | 233 | C-repeat-binding factor 4                         | 2E-60  | 224 | AP2/ERF domain [Macleaya cordata]                                                         | 1E-86  | 228 |
| <b>EcAP2/ERF101</b> | 373 | MAGPIE:eca_ECARTPF1_Velvet--<br>Singlet5661         | 9E-24 | 412 | SUN6                                              | 1E-30  | 326 | ethylene-responsive transcription factor ABI4 [Papaver<br>somniferum]                     | 2E-35  | 336 |
| <b>EcAP2/ERF102</b> | 182 | MAGPIE:eca_ECARTPF1_Velvet--<br>Contig6349          | 4E-18 | 201 | Integrase-type DNA-binding superfamily<br>protein | 2E-35  | 187 | AP2/ERF domain [Macleaya cordata]                                                         | 3E-81  | 184 |
| <b>EcAP2/ERF103</b> | 196 | MAGPIE:eca_ECARTPF1_Velvet--<br>Contig6349          | 0     | 201 | Integrase-type DNA-binding superfamily<br>protein | 1E-50  | 185 | AP2/ERF domain [Macleaya cordata]                                                         | 2E-74  | 188 |
| <b>EcAP2/ERF104</b> | 318 | MAGPIE:eca_ECARTPF1_Velvet--<br>Singlet37091        | 5E-89 | 326 | Integrase-type DNA-binding superfamily<br>protein | 3E-34  | 298 | AP2/ERF domain [Macleaya cordata]                                                         | 2E-55  | 345 |
| <b>EcAP2/ERF105</b> | 301 | MAGPIE:eca_ECARTPF1_Velvet--<br>Contig10931         | 0     | 274 | PLT2                                              | 1E-65  | 565 | AP2-like ethylene-responsive transcription factor PLT2<br>isoform X2 [Papaver somniferum] | 2E-117 | 279 |
| <b>EcAP2/ERF106</b> | 263 | MAGPIE:eca_ECARTPF1_Velvet--<br>Contig16505         | 0     | 266 | PLT1                                              | 5E-71  | 571 | AP2/ERF domain [Macleaya cordata]                                                         | 7E-147 | 271 |
| <b>EcAP2/ERF107</b> | 406 | MAGPIE:eca_ECARTPF1_Velvet--<br>Contig3225          | 0     | 411 | BBM                                               | 7E-69  | 580 | AP2-like ethylene-responsive transcription factor PLT1<br>[Papaver somniferum]            | 1E-136 | 413 |
| <b>EcAP2/ERF108</b> | 548 | MAGPIE:eca_ECARTPF1_Velvet--<br>Singlet7487         | 0     | 376 | AINTEGUMENTA-like 6                               | 2E-85  | 543 | AP2/ERF domain [Macleaya cordata]                                                         | 2E-180 | 536 |
| <b>EcAP2/ERF109</b> | 617 | MAGPIE:eca_ECARTPF1_Velvet--<br>Singlet31985        | 0     | 568 | CKC                                               | 8E-146 | 555 | PREDICTED: AP2-like ethylene-responsive transcription<br>factor AIL1 [Nelumbo nucifera]   | 1E-130 | 597 |

|                     |     |                                                       |        |     |                                                |        |     |                                                                                               |        |     |
|---------------------|-----|-------------------------------------------------------|--------|-----|------------------------------------------------|--------|-----|-----------------------------------------------------------------------------------------------|--------|-----|
| <b>EcAP2/ERF110</b> | 503 | MAGPIE:eca_ECARTPF1_Velvet--<br>Contig23931           | 0      | 449 | related to AP2.7                               | 3E-97  | 464 | PREDICTED: ethylene-responsive transcription factor RAP2-7-like isoform X1 [Nelumbo nucifera] | 1E-142 | 511 |
| <b>EcAP2/ERF111</b> | 573 | MAGPIE:eca_ECARTPF1_Velvet--<br>Singlet31327          | 3E-50  | 699 | PLT1                                           | 5E-67  | 571 | PREDICTED: AP2-like ethylene-responsive transcription factor AIL1 [Nelumbo nucifera]          | 3E-149 | 597 |
| <b>EcAP2/ERF112</b> | 507 | MAGPIE:eca_ECARTPF1_Velvet--<br>Singlet7487           | 6E-129 | 376 | AINTEGUMENTA-like 5                            | 4E-128 | 558 | AP2-like ethylene-responsive transcription factor AIL5 isoform X2 [Papaver somniferum]        | 2E-156 | 509 |
| <b>EcAP2/ERF113</b> | 552 | MAGPIE:eca_ECARTPF1_Velvet--<br>Singlet31327          | 6E-53  | 699 | PLT2                                           | 2E-126 | 565 | PREDICTED: AP2-like ethylene-responsive transcription factor PLT2 [Nelumbo nucifera]          | 4E-159 | 542 |
| <b>EcAP2/ERF114</b> | 373 | MAGPIE:eca_ECARTPF1_Velvet--<br>Singlet32373          | 0      | 171 | Integrase-type DNA-binding superfamily protein | 4E-10  | 307 | PREDICTED: ethylene-responsive transcription factor ERF118 [Nelumbo nucifera]                 | 1E-22  | 343 |
| <b>EcAP2/ERF115</b> | 593 | MAGPIE:eca_ECARTPF1_Velvet--<br>Singlet7856           | 1E-100 | 593 | PLT2                                           | 8E-34  | 565 | AP2/ERF domain [Macleaya cordata]                                                             | 6E-80  | 543 |
| <b>EcAP2/ERF116</b> | 117 | MAGPIE:eca_ECARTPF1_assembled--<br>ECARTPF1_c8731     | 0.17   | 172 | ethylene response factor 7                     | 1E-06  | 244 | AP2/ERF domain [Macleaya cordata]                                                             | 7E-05  | 150 |
| <b>EcAP2/ERF117</b> | 674 | MAGPIE:eca_ECARTPF1_Velvet--<br>Singlet7856           | 1E-100 | 593 | PLT2                                           | 6E-30  | 565 | AP2-like ethylene-responsive transcription factor PLT2 isoform X2 [Papaver somniferum]        | 5E-82  | 555 |
| <b>EcAP2/ERF118</b> | 117 | MAGPIE:eca_ECARTPF1_assembled--<br>ECARTPF1_rep_c3805 | 0.59   | 139 | ethylene response factor 7                     | 2E-10  | 244 | PREDICTED: ethylene-responsive transcription factor 9-like [Nelumbo nucifera]                 | 5E-07  | 175 |
| <b>EcAP2/ERF119</b> | 369 | MAGPIE:eca_ECARTPF1_Velvet--<br>Singlet42715          | 0      | 368 | AP2/B3 transcription factor family protein     | 1E-126 | 361 | AP2/ERF and B3 domain-containing transcription factor RAV1-like [Papaver somniferum]          | 1E-169 | 379 |
| <b>EcAP2/ERF120</b> | 112 | MAGPIE:eca_ECARTPF1_Velvet--<br>Singlet38270          | 0.046  | 172 | Integrase-type DNA-binding superfamily protein | 1E-08  | 219 | AP2/ERF domain [Macleaya cordata]                                                             | 1E-06  | 150 |
| <b>EcAP2/ERF121</b> | 367 | MAGPIE:eca_ECARTPF1_Velvet--<br>Singlet41935          | 0      | 397 | RAV1                                           | 1E-134 | 344 | AP2/ERF and B3 domain-containing transcription factor RAV1-like [Papaver somniferum]          | 8E-157 | 387 |
| <b>EcAP2/ERF122</b> | 375 | MAGPIE:eca_ECARTPF1_Velvet--<br>Singlet7487           | 2E-56  | 376 | Integrase-type DNA-binding superfamily protein | 5E-84  | 430 | AP2/ERF domain [Macleaya cordata]                                                             | 9E-122 | 400 |
| <b>EcAP2/ERF123</b> | 314 | MAGPIE:eca_ECARTPF1_Velvet--<br>Singlet31985          | 3E-23  | 568 | ARIA-interacting double AP2 domain protein     | 1E-23  | 211 | AP2/ERF domain [Macleaya cordata]                                                             | 9E-51  | 337 |
| <b>EcAP2/ERF124</b> | 564 | MAGPIE:eca_ECARTPF1_Velvet--<br>Contig5418            | 0      | 389 | Integrase-type DNA-binding superfamily protein | 3E-109 | 432 | AP2-like ethylene-responsive transcription factor AIL5 isoform X2 [Papaver somniferum]        | 2E-155 | 604 |
| <b>EcAP2/ERF125</b> | 318 | MAGPIE:eca_ECARTPF1_Velvet--<br>Contig20512           | 3E-16  | 324 | related to AP2 11                              | 1E-29  | 253 | AP2/ERF domain [Macleaya cordata]                                                             | 7E-87  | 286 |

|                     |     |                                              |            |     |                                                   |       |     |                                                                                                             |       |     |
|---------------------|-----|----------------------------------------------|------------|-----|---------------------------------------------------|-------|-----|-------------------------------------------------------------------------------------------------------------|-------|-----|
| <b>EcAP2/ERF126</b> | 373 | MAGPIE:eca_ECARTPF1_Velvet--<br>Singlet7678  | 0          | 166 | cytokinin response factor 2                       | 8E-19 | 343 | AP2/ERF domain [Macleaya cordata]                                                                           | 3E-54 | 344 |
| <b>EcAP2/ERF127</b> | 227 | MAGPIE:eca_ECARTPF1_Velvet--<br>Contig12874  | 0          | 162 | Integrase-type DNA-binding superfamily<br>protein | 3E-42 | 196 | PREDICTED: ethylene-responsive transcription factor-like<br>protein At4g13040 isoform X2 [Nelumbo nucifera] | 3E-77 | 232 |
| <b>EcAP2/ERF128</b> | 132 | MAGPIE:eca_ECARTPF1_Velvet--<br>Contig25951  | 0.005      | 197 | ERF domain protein 10                             | 1E-09 | 245 | PREDICTED: ethylene-responsive transcription factor 9-like<br>[Nelumbo nucifera]                            | 3E-07 | 175 |
| <b>EcAP2/ERF129</b> | 351 | MAGPIE:eca_ECARTPF1_Velvet--<br>Contig11750  | 0          | 351 | Integrase-type DNA-binding superfamily<br>protein | 5E-38 | 341 | PREDICTED: dehydration-responsive element-binding<br>protein 2C-like [Nelumbo nucifera]                     | 8E-56 | 362 |
| <b>EcAP2/ERF130</b> | 358 | MAGPIE:eca_ECARTPF1_Velvet--<br>Contig28265  | 0          | 355 | hypothetical protein AXX17_AT2G37430              | 6E-34 | 194 | AP2/ERF domain [Macleaya cordata]                                                                           | 5E-74 | 345 |
| <b>EcAP2/ERF131</b> | 306 | MAGPIE:eca_ECARTPF1_Velvet--<br>Contig20832  | 0.00000001 | 309 | SUN6                                              | 1E-22 | 326 | PREDICTED: ethylene-responsive transcription factor ABI4<br>[Nelumbo nucifera]                              | 2E-20 | 290 |
| <b>EcAP2/ERF132</b> | 202 | MAGPIE:eca_ECARTPF1_Velvet--<br>Contig6349   | 3E-96      | 201 | hypothetical protein AXX17_AT1G20160              | 1E-44 | 185 | ethylene-responsive transcription factor ERF017-like<br>[Papaver somniferum]                                | 7E-60 | 209 |
| <b>EcAP2/ERF133</b> | 132 | MAGPIE:eca_ECARTPF1_Velvet--<br>Contig27787  | 0.0000007  | 203 | Integrase-type DNA-binding superfamily<br>protein | 5E-13 | 219 | AP2/ERF domain [Macleaya cordata]                                                                           | 6E-11 | 150 |
| <b>EcAP2/ERF134</b> | 132 | MAGPIE:eca_ECARTPF1_Velvet--<br>Singlet39940 | 0.0004     | 169 | ethylene response factor 7                        | 1E-10 | 244 | PREDICTED: ethylene-responsive transcription factor 9-like<br>[Nelumbo nucifera]                            | 2E-08 | 175 |

**Supplementary Table S5 Primer sequences**

| <b>Gene</b>         | <b>Oligonucleotide sequences (5' to 3')</b> |                                 |
|---------------------|---------------------------------------------|---------------------------------|
| <i>EcAP2/ERF1</i>   | Fw                                          | TGTGATTCCCCTTTTGATTTGG          |
|                     | Rv                                          | CACCACTGCCGCTTTAACTTTC          |
| <i>EcAP2/ERF2</i>   | Fw                                          | CGGAATCTGACATCAAGCCTTC          |
|                     | Rv                                          | GCGATAGCAAGGGAAAGTCAAA          |
| <i>EcAP2/ERF3</i>   | Fw                                          | AACACCTTCTCAGCGATTTTG           |
|                     | Rv                                          | TCTGTGACTTGGAAATTCTGTTGG        |
| <i>EcAP2/ERF4</i>   | Fw                                          | TGAAAATGGCAACTCAAGACGA          |
|                     | Rv                                          | AGAAACCGCCGGAATTTCAA            |
| <i>EcAP2/ERF6</i>   | Fw                                          | GCATTACTCAATTTCCCTGCTGA         |
|                     | Rv                                          | ATCATTTTTTCGGCACGAGAGAG         |
| <i>EcAP2/ERF12</i>  | Fw                                          | TACAGCCGAAGAGGCAGCTTTA          |
|                     | Rv                                          | CACCACAGGAGAACACCCTTCT          |
| <i>EcAP2/ERF16</i>  | Fw                                          | TCGAGCACCGAATATCATCC            |
|                     | Rv                                          | CATTGAGACGAGGCAAGTCG            |
| <i>EcAP2/ERF17</i>  | Fw                                          | GGATTCTTTTTCGGCCTTCC            |
|                     | Rv                                          | TGAGGCTTCTTTGGGTGCTT            |
| <i>EcAP2/ERF18</i>  | Fw                                          | GCCAATTACACCACCAGCTCAT          |
|                     | Rv                                          | TGTTCTTGCTCGGGTTTCACTT          |
| <i>EcAP2/ERF19</i>  | Fw                                          | GGA CTGGCGATCTTCGATTC           |
|                     | Rv                                          | GACACCATTCTTCTGCTAAAACA         |
| <i>EcAP2/ERF20</i>  | Fw                                          | CATCACTACCCACGCAGCAC            |
|                     | Rv                                          | TATTTTCGGCTGCCCATTTTC           |
| <i>EcAP2/ERF26</i>  | Fw                                          | CAGCTCACCCACCACCAGTA            |
|                     | Rv                                          | CGATTCCACAAGTCCGACAA            |
| <i>EcAP2/ERF77</i>  | Fw                                          | CCATGATGTAGCTGCACTTGC           |
|                     | Rv                                          | ACCGGCTTAAATAACATGGCC           |
| <i>EcAP2/ERF79</i>  | Fw                                          | GCGGCGTTTTGTCTTAAAGG            |
|                     | Rv                                          | ACGTGGAAGGTCGAGGAAGA            |
| <i>EcAP2/ERF121</i> | Fw                                          | CCGGCCCTGATAAACTC               |
|                     | Rv                                          | TAACCACATGACCCGTTGGA            |
| <i>EcbHLH1-1</i>    | Fw                                          | CTAGACAGATCGCCTGTTTTGTTG        |
|                     | Rv                                          | GAGATAGATGACCCTTTAGATAATGAGATCC |
| <i>EcbHLH1-2</i>    | Fw                                          | GGTTGGACAAATCACCAGCTTTAC        |
|                     | Rv                                          | AAGATAGAGGGTTCATAATGATAGCAAG    |

|                   |    |                          |
|-------------------|----|--------------------------|
| <i>Ec6OMT</i>     | Fw | CCTGTTCAACCCGTTGACTTAG   |
|                   | Rv | CCCAACCCTTAATCAGAAATTTG  |
| <i>EcCYP719A5</i> | Fw | CCTGATCTTAGTGAGGATCATTGC |
|                   | Rv | ATGCTAGCACTACATGCCATTTAC |
| <i>EcActin</i>    | Fw | GGTATTGTGCTGGATTCTGGTG   |
|                   | Rv | GTAGGATTGCGTGGGGTAGTG    |

---



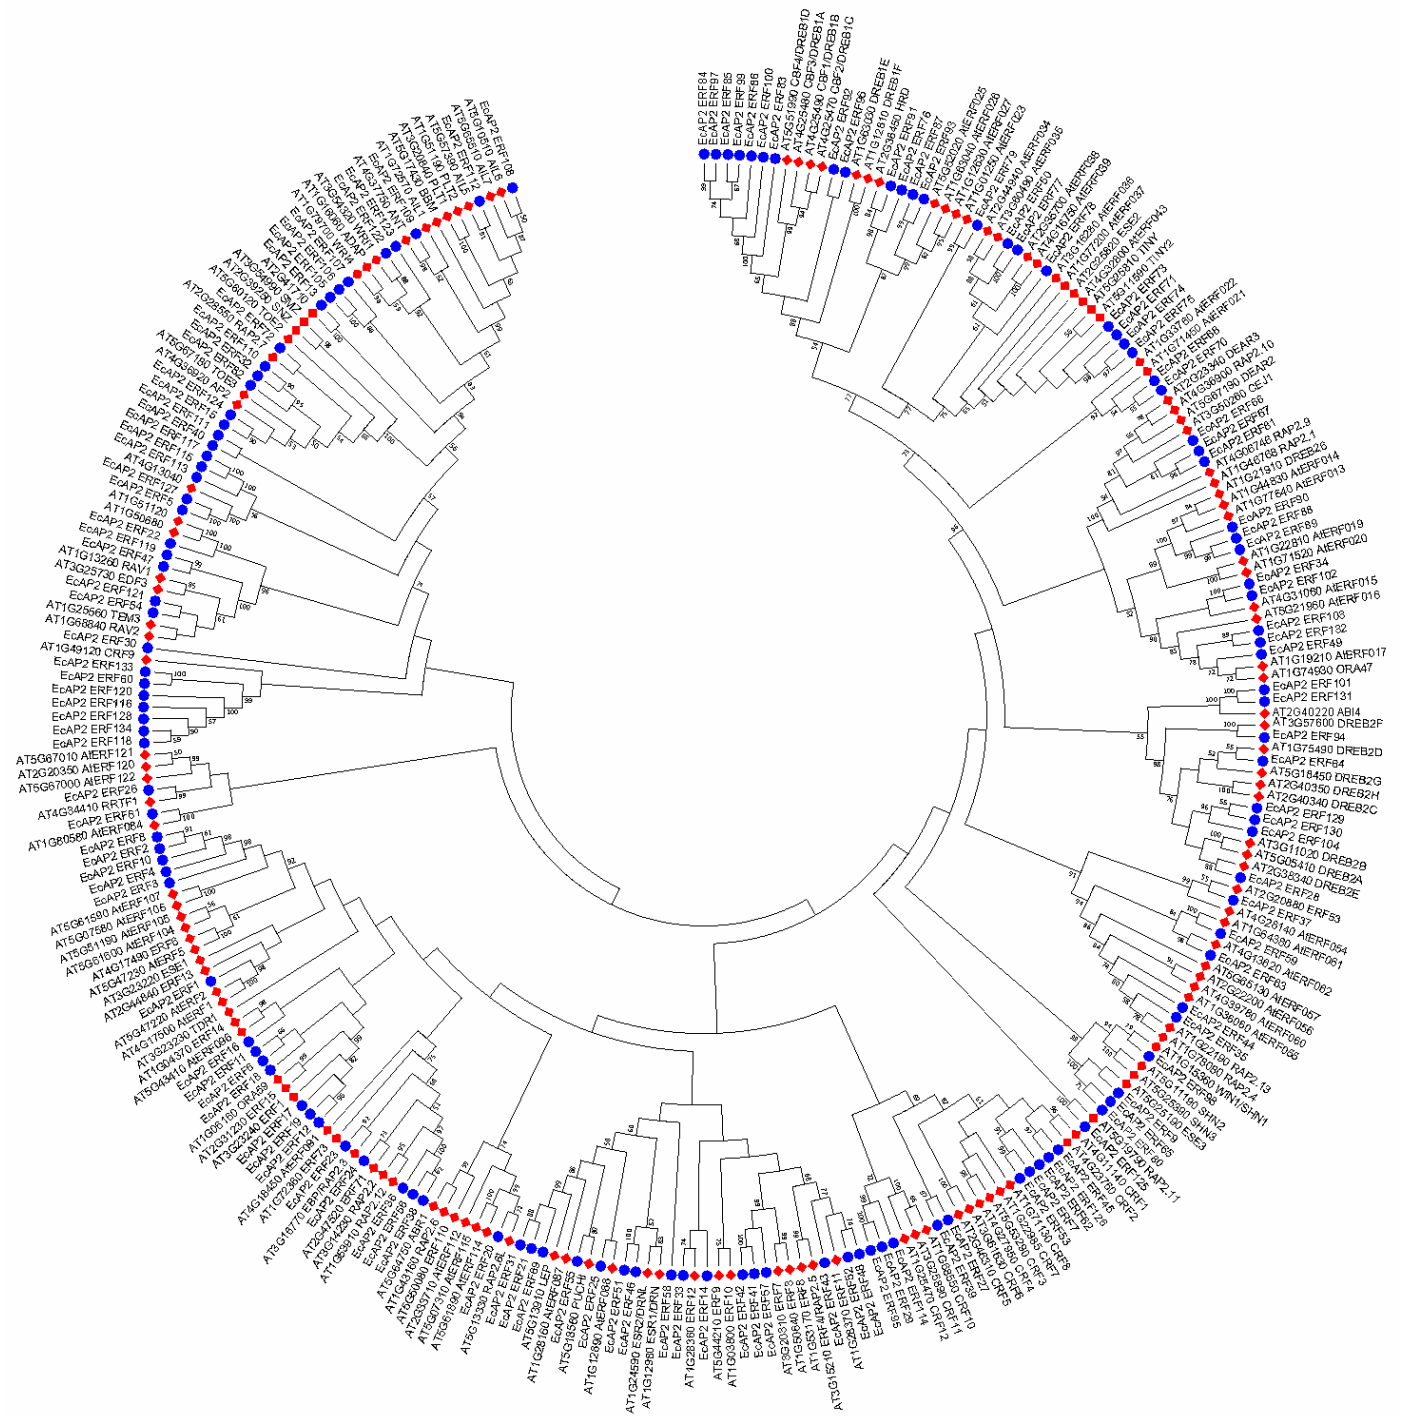

**Supplementary Figure S2**

**Un-rooted phylogenetic tree of full-length *E. californica* and *A. thaliana* AP2/ERF transcription factors.**

The NJ tree was constructed from the full-length amino acid sequences of the 134 *Ec*AP2/ERF (blue circle) and 147 Arabidopsis AP2/ERF (red diamond) proteins. Bootstrap confidence values from 1000 replicates are indicated at each branch.
